# Supplementary material
Source: PubMed Central journal article supplement (PMC5911784)
Supplement: DCi180007SupplementaryData.pdf [file DCi180007SupplementaryData.pdf]

## Economic Costs of Diabetes in the U.S. in 2017

### Appendix 1. Additional Tables and Figures

*Supplementary Table A-1. Summary of data sources*

| <b>Data Source and Description</b>                                                                                                                                                                           | <b>Used to Estimate/Analysis</b>                                                                                                                                                                                                                                                                                                                                                 | <b>+Strengths and - Limitations</b>                                                                                                                                                                                                                                                                                                                                                           |
|--------------------------------------------------------------------------------------------------------------------------------------------------------------------------------------------------------------|----------------------------------------------------------------------------------------------------------------------------------------------------------------------------------------------------------------------------------------------------------------------------------------------------------------------------------------------------------------------------------|-----------------------------------------------------------------------------------------------------------------------------------------------------------------------------------------------------------------------------------------------------------------------------------------------------------------------------------------------------------------------------------------------|
| <p>Current Population Survey (CPS): 2016 Available at</p> <p>Available at:<br/> <a href="http://www.census.gov/cps/data/">http://www.census.gov/cps/data/</a></p>                                            | <ul style="list-style-type: none"> <li>• annual and daily earnings by demographic</li> </ul>                                                                                                                                                                                                                                                                                     | <ul style="list-style-type: none"> <li>+ large sample size</li> <li>- file does not contain diabetes status</li> </ul>                                                                                                                                                                                                                                                                        |
| <p>Behavioral Risk Factor Surveillance System (BRFSS): combined 2015 - 2016 surveys</p> <p>Available at:<br/> <a href="http://www.cdc.gov/brfss/">http://www.cdc.gov/brfss/</a></p>                          | <ul style="list-style-type: none"> <li>• state level population by age, sex, race/ethnicity, and insurance status</li> </ul>                                                                                                                                                                                                                                                     | <ul style="list-style-type: none"> <li>+ large sample size</li> <li>- diabetes status self-reported based on answer to the question, "Have you ever been told by a doctor that you have diabetes?"</li> <li>- excludes institutionalized population where diabetes is over-represented</li> </ul>                                                                                             |
| <p>American Community Survey (ACS): 2016</p> <p>Available at:<br/> <a href="http://www.census.gov/acs/www/">http://www.census.gov/acs/www/</a></p>                                                           | <ul style="list-style-type: none"> <li>• state level diagnosed diabetes prevalence by age, sex, race/ethnicity, and insurance status</li> </ul>                                                                                                                                                                                                                                  | <ul style="list-style-type: none"> <li>+ large sample size that is representative of the population in each state</li> <li>- diabetes status not collected</li> </ul>                                                                                                                                                                                                                         |
| <p>National Health Interview Survey (NHIS): combine 2014-2016 surveys to increase sample size.</p> <p>Available at:<br/> <a href="http://www.cdc.gov/nchs/nhis.htm">http://www.cdc.gov/nchs/nhis.htm</a></p> | <ul style="list-style-type: none"> <li>• diagnosed diabetes prevalence rates for children by sex and race/ethnicity</li> <li>• prevalence of insulin and other anti-diabetic agents use</li> <li>• impact of diabetes on employment and missed work days</li> </ul>                                                                                                              | <ul style="list-style-type: none"> <li>+ large sample size</li> <li>+ contains employment-related information</li> <li>- diabetes status self-reported based on answer to the question, "Have you EVER been told by a doctor or health professional that you have diabetes or sugar diabetes?"</li> <li>- excludes institutionalized population where diabetes is over-represented</li> </ul> |
| <p>Medical Expenditure Panel Survey (MEPS): combine 2011-2015 surveys to increase sample size.</p> <p>Available at:<br/> <a href="http://meps.ahrq.gov/mepsweb/">http://meps.ahrq.gov/mepsweb/</a></p>       | <ul style="list-style-type: none"> <li>• average cost per physician office, outpatient and emergency department visit, inpatient physician services and prescription medication</li> <li>• average annual expenditures for podiatry, home health, insulin, other anti-diabetic agents, diabetes-related supplies, ambulance, and other medical equipment and supplies</li> </ul> | <ul style="list-style-type: none"> <li>+ rich source of health resource use and cost information</li> <li>- relatively small sample size per year</li> <li>- contains only 3-digit diagnosis codes; many chronic complications of diabetes require 4-digit and 5-digit codes to identify</li> <li>- excludes institutionalized population where diabetes is over-represented</li> </ul>       |

SUPPLEMENTARY DATA

| <b>Data Source and Description</b>                                                                                                                                                                                                                                                                                                                        | <b>Used to Estimate/Analysis</b>                                                                                                                                                                                                                               | <b>+Strengths and - Limitations</b>                                                                                                                                                                                                                                                                                                                                                   |
|-----------------------------------------------------------------------------------------------------------------------------------------------------------------------------------------------------------------------------------------------------------------------------------------------------------------------------------------------------------|----------------------------------------------------------------------------------------------------------------------------------------------------------------------------------------------------------------------------------------------------------------|---------------------------------------------------------------------------------------------------------------------------------------------------------------------------------------------------------------------------------------------------------------------------------------------------------------------------------------------------------------------------------------|
| <p>Medicare Current Beneficiary Survey: 2013</p> <p>Available at:<br/> <a href="https://www.cms.gov/Research-Statistics-Data-and-Systems/Research/MCBS/">https://www.cms.gov/Research-Statistics-Data-and-Systems/Research/MCBS/</a></p>                                                                                                                  | <ul style="list-style-type: none"> <li>• prevalence of diabetes, smoking, overweight and obese, and chronic disease among population living in residential care facilities</li> </ul>                                                                          | <ul style="list-style-type: none"> <li>+ large sample size</li> <li>+ most recent individual level data available on people in residential care (using subset of MCBS on people in this living arrangement)</li> <li>- people in residential care who are not in Medicare are assumed to have disease prevalence similar to a person with the same demographic in Medicare</li> </ul> |
| <p>National Ambulatory Medical Care Survey (NAMCS): combine 2013-2015 surveys to increase sample size.</p> <p>Available at:<br/> <a href="http://www.cdc.gov/nchs/ahcd.htm">http://www.cdc.gov/nchs/ahcd.htm</a></p>                                                                                                                                      | <ul style="list-style-type: none"> <li>• national number of physician office visits by medical condition (using primary diagnosis code)</li> <li>• average number of prescriptions written per visit</li> </ul>                                                | <ul style="list-style-type: none"> <li>+ larger sample size than MEPS</li> <li>+ contains 5-digit diagnosis codes to identify chronic complications of diabetes</li> <li>- visits are the units of observations, with incomplete information on patients (including whether they have diabetes)</li> </ul>                                                                            |
| <p>National Hospital Ambulatory Medical Care Survey (NHAMCS): combine 2012-2014 surveys to increase sample size for emergency visits; 2009-2011 data for outpatient visits</p> <p>Available at:<br/> <a href="http://www.cdc.gov/nchs/ahcd.htm">http://www.cdc.gov/nchs/ahcd.htm</a></p>                                                                  | <ul style="list-style-type: none"> <li>• national number of hospital outpatient and emergency department visits by medical condition (using primary diagnosis code)</li> <li>• average number of prescriptions written per visit</li> </ul>                    | <ul style="list-style-type: none"> <li>+ same as NAMCS</li> <li>- same as NAMCS</li> </ul>                                                                                                                                                                                                                                                                                            |
| <p>National Inpatient Sample (NIS): 2014 survey.</p> <p>Available at: <a href="http://www.hcup-us.ahrq.gov/nisoverview.jsp">http://www.hcup-us.ahrq.gov/nisoverview.jsp</a></p>                                                                                                                                                                           | <ul style="list-style-type: none"> <li>• national number of hospital inpatient days for diabetes and comorbidities of diabetes (using primary diagnosis)</li> <li>• cost per inpatient day calculated using hospital-specific cost-to-charge ratios</li> </ul> | <ul style="list-style-type: none"> <li>+ same as NAMCS</li> <li>- same as NAMCS</li> </ul>                                                                                                                                                                                                                                                                                            |
| <p>National Home and Hospice Care Survey (NHHCS): 2007 survey.</p> <p>Available at:<br/> <a href="http://www.cdc.gov/nchs/nhhcs.htm">http://www.cdc.gov/nchs/nhhcs.htm</a></p>                                                                                                                                                                            | <ul style="list-style-type: none"> <li>• hospice care use</li> </ul>                                                                                                                                                                                           | <ul style="list-style-type: none"> <li>+ same as NAMCS</li> <li>- same as NAMCS</li> </ul>                                                                                                                                                                                                                                                                                            |
| <p>CMS Long Term Care Minimum Data Set (MDS): 2013 data</p> <p>Available at:<br/> <a href="http://www.cms.gov/Research-Statistics-Data-and-Systems/Files-for-Order/IdentifiableDataFiles/StandardAnalyticalFiles.html">http://www.cms.gov/Research-Statistics-Data-and-Systems/Files-for-Order/IdentifiableDataFiles/StandardAnalyticalFiles.html</a></p> | <ul style="list-style-type: none"> <li>• nursing facility use</li> </ul>                                                                                                                                                                                       | <ul style="list-style-type: none"> <li>+ large sample size</li> <li>+ contains data on all patients who reside in nursing homes that receive payments from CMS</li> <li>+ reflects variation in patient characteristics across states</li> </ul>                                                                                                                                      |

## SUPPLEMENTARY DATA

| <b>Data Source and Description</b>                                                                                                                                                                                                                                                                                                                                                            | <b>Used to Estimate/Analysis</b>                                                                                                                                                                                                                                                                      | <b>+Strengths and<br/>- Limitations</b>                                                                                                                                                                                                                                                                 |
|-----------------------------------------------------------------------------------------------------------------------------------------------------------------------------------------------------------------------------------------------------------------------------------------------------------------------------------------------------------------------------------------------|-------------------------------------------------------------------------------------------------------------------------------------------------------------------------------------------------------------------------------------------------------------------------------------------------------|---------------------------------------------------------------------------------------------------------------------------------------------------------------------------------------------------------------------------------------------------------------------------------------------------------|
| <p>OptumInsight De-Identified Normative Health Informatics (dNHI): 2013-2015 data</p> <p>Proprietary data, overview available at: <a href="http://www.optuminsight.com/life-sciences/solutions/real-world-evidence/data-assets/retrospective-database/overview/">http://www.optuminsight.com/life-sciences/solutions/real-world-evidence/data-assets/retrospective-database/overview/</a></p> | <ul style="list-style-type: none"> <li>• calculate age-sex specific relative rate ratios for each medical condition for hospital inpatient days, emergency department visits, and ambulatory visits (physician office and hospital outpatient combined) for population under the age of 65</li> </ul> | <ul style="list-style-type: none"> <li>+ large sample size</li> <li>+ all medical records can be linked for the year to identify people with diabetes based on whether they have any diabetes diagnosis code during the year</li> <li>- lacks detailed data on health behavior found in MEPS</li> </ul> |
| <p>Medicare 5% Sample Standard Analytical Files (SAF): 2014 data</p> <p>Available at: <a href="http://www.cms.gov/Research-Statistics-Data-and-Systems/Files-for-Order/IdentifiableDataFiles/StandardAnalyticalFiles.html">http://www.cms.gov/Research-Statistics-Data-and-Systems/Files-for-Order/IdentifiableDataFiles/StandardAnalyticalFiles.html</a></p>                                 | <ul style="list-style-type: none"> <li>• calculate age-sex specific relative rate ratios for each medical condition for hospital inpatient days, emergency department visits, and ambulatory visits (physician office and hospital outpatient combined) for population over the age of 65</li> </ul>  | <ul style="list-style-type: none"> <li>+ large sample size</li> <li>+ all medical records can be linked for the year to identify people with diabetes based on whether they have any diabetes diagnosis code during the year</li> <li>+ lacks detailed data on health behavior found in MEPS</li> </ul> |

SUPPLEMENTARY DATA

*Supplementary Table A- 2. U.S. population and percent of U.S. population with diabetes, 2017 (in thousands)*

|                               | <b>Total<br/>U.S.<br/>Population</b> | <b>With diagnosed<br/>diabetes</b> |       |
|-------------------------------|--------------------------------------|------------------------------------|-------|
| Total Population <sup>1</sup> | 326,600                              | 24,700                             | 7.6%  |
| Adult Population <sup>2</sup> | 252,800                              | 24,600                             | 9.7%  |
| <b>Race/ethnicity</b>         |                                      |                                    |       |
| Non-Hispanic white            | 198,800                              | 15,100                             | 7.6%  |
| Non-Hispanic black            | 40,500                               | 4,000                              | 10.0% |
| Non-Hispanic other            | 27,800                               | 1,900                              | 6.8%  |
| Hispanic                      | 59,500                               | 3,700                              | 6.2%  |
| <b>Sex</b>                    |                                      |                                    |       |
| Male                          | 161,000                              | 12,800                             | 8.0%  |
| Female                        | 165,600                              | 11,900                             | 7.2%  |
| <b>Age (years)</b>            |                                      |                                    |       |
| <18                           | 73,800                               | 100                                | 0.2%  |
| 18-34                         | 76,200                               | 1,000                              | 1.3%  |
| 35-44                         | 40,900                               | 1,900                              | 4.7%  |
| 45-54                         | 42,400                               | 4,100                              | 9.6%  |
| 55-59                         | 22,100                               | 3,100                              | 13.8% |
| 60-64                         | 20,100                               | 3,500                              | 17.6% |
| 65-69                         | 16,900                               | 3,600                              | 21.2% |
| 70+                           | 34,100                               | 7,400                              | 21.8% |
| <b>Insurance</b>              |                                      |                                    |       |
| Private                       | 188,100                              | 9,100                              | 4.8%  |
| Government <sup>3</sup>       | 110,200                              | 14,200                             | 12.9% |
| Uninsured                     | 28,300                               | 1,400                              | 4.9%  |

Data source: ACS (2016), BRFSS (2015-2016), MCBS (2013), CMS MDS (2015), NHIS (2014-2016) and U.S. Census Bureau (2016 & 2017).

<sup>1</sup> Numbers do not necessarily sum to totals because of rounding.

<sup>2</sup> Age 18 and older.

<sup>3</sup> Includes Medicare, Medicaid, Children's health Insurance Program and Indian Health Service.

SUPPLEMENTARY DATA

**Supplementary Table A-3. Average cost per medical event (visit or day), by medical condition and type of service, 2017 (in actual dollars)**

| Medical Event              | Diabetes | Chronic Complications <sup>1</sup> |                     |                |       |           |            |                    | General Medical <sup>3</sup> | Average |
|----------------------------|----------|------------------------------------|---------------------|----------------|-------|-----------|------------|--------------------|------------------------------|---------|
|                            |          | Neurological                       | Peripheral vascular | Cardiovascular | Renal | Metabolic | Ophthalmic | Other <sup>2</sup> |                              |         |
| Hospital inpatient days    | 2,413    | 3,242                              | 3,060               | 4,083          | 2,203 | 2,823     | 3,457      | 2,253              | 2,920                        | 3,084   |
| Hospital outpatient visits | 617      | 712                                | 929                 | 638            | 1,171 | 353       | 1,224      | 2,205              | 1,062                        | 894     |
| Emergency visits           | 1,032    | 737                                | 1,104               | 1,445          | 908   | 1,326     | 972        | 1,081              | 1,102                        | 1,105   |
| Physician office visits    | 211      | 237                                | 320                 | 237            | 401   | 179       | 304        | 221                | 249                          | 247     |

Data source: NIS (2014), NAMCS (2013-2015), NHAMCS (2012-2014) and MEPS (2011-2015).

<sup>1</sup> See Supplementary Appendix 2 for diagnosis codes for each category of complications.

<sup>2</sup> Includes bacteremia, candidiasis of skin and nails, chronic osteomyelitis of the foot, other and unspecified noninfectious gastroenteritis and colitis, impotence of organic origin, infective otitis externa, degenerative skin disorders, candidiasis of vulva and vagina, cellulitis, diabetes with other specified manifestations, diabetes with unspecified complication, and other bone involvement in disease classified elsewhere.

<sup>3</sup> Includes all other health care use that is not a known comorbidity of diabetes.

**Supplementary Table A-4. Health resource use attributed to diabetes in the U.S., by age group and type of service, 2017 (in thousands of units)**

| Health resource                   | Age (years)      |                   |                     |
|-----------------------------------|------------------|-------------------|---------------------|
|                                   | <65<br>(N=13.7M) | ≥ 65<br>(N=11.0M) | Total*<br>(N=24.7M) |
| <b>Institutional care</b>         |                  |                   |                     |
| Hospital inpatient days           | 8,256 (37%)      | 14,334 (63%)      | 22,590              |
| Nursing/residential facility days | 20,167 (35%)     | 37,142 (65%)      | 57,309              |
| Hospice days                      | 26 (9%)          | 257 (91%)         | 284                 |
| <b>Physician office visits</b>    |                  |                   |                     |
| Physician office visits           | 40,252 (33%)     | 81,313 (67%)      | 121,566             |
| Emergency department visits       | 3,888 (54%)      | 3,341 (46%)       | 7,228               |
| Hospital outpatient visits        | 6,322 (47%)      | 7,149 (53%)       | 13,471              |
| Home health visits                | 7,688 (76%)      | 2,379 (24%)       | 10,066              |
| Medication prescriptions          | 202,422 (30%)    | 462,027 (70%)     | 664,449             |

Data source: NIS (2014), MCBS (2013), CMS MDS (2015), NAMCS (2013-2015), NHAMCS (2012-2014), MEPS (2011-2015) and NHHCS (2007).

\* Numbers do not necessarily sum to totals because of rounding.

SUPPLEMENTARY DATA

**Supplementary Table A-5. Health resource use attributed to diabetes in the U.S., by medical condition and type of service, 2017 (in thousands of units)**

| Medical Event               | Chronic Complications <sup>1</sup> |               |                     |                 |               |               |               |                    | General Medical <sup>3</sup> | Total*            |
|-----------------------------|------------------------------------|---------------|---------------------|-----------------|---------------|---------------|---------------|--------------------|------------------------------|-------------------|
|                             | Diabetes                           | Neurological  | Peripheral Vascular | Cardiovascular  | Renal         | Metabolic     | Ophthalmic    | Other <sup>2</sup> |                              |                   |
| Hospital inpatient days     | 857<br>(4%)                        | 1,792<br>(8%) | 1,229<br>(5%)       | 4,955<br>(22%)  | 1,545<br>(7%) | 73<br>(0%)    | 14<br>(0%)    | 1,910<br>(8%)      | 10,215<br>(45%)              | 22,590<br>(100%)  |
| Physician office visits     | 26,682<br>(22%)                    | 2,669<br>(2%) | 2,144<br>(2%)       | 15,500<br>(13%) | 3,725<br>(3%) | 1,757<br>(1%) | 7,415<br>(6%) | 1,778<br>(1%)      | 59,895<br>(49%)              | 121,566<br>(100%) |
| Emergency department visits | 404<br>(6%)                        | 181<br>(3%)   | 126<br>(2%)         | 634<br>(9%)     | 451<br>(6%)   | 27<br>(0%)    | 26<br>(0%)    | 591<br>(8%)        | 4,787<br>(66%)               | 7,228<br>(100%)   |
| Hospital outpatient visits  | 4,257<br>(32%)                     | 284<br>(2%)   | 538<br>(4%)         | 1,486<br>(11%)  | 431<br>(3%)   | 106<br>(1%)   | 450<br>(3%)   | 347<br>(3%)        | 5,571<br>(41%)               | 13,471<br>(100%)  |

Data source: NIS (2014), NAMCS (2013-2015) and NHAMCS (2012-2014).

<sup>1</sup> See Supplementary Appendix 2 for diagnosis codes for each category of complications.

<sup>2</sup> Includes bacteremia, candidiasis of skin and nails, chronic osteomyelitis of the foot, other and unspecified noninfectious gastroenteritis and colitis, impotence of organic origin, infective otitis externa, degenerative skin disorders, candidiasis of vulva and vagina, cellulitis, diabetes with other specified manifestations, diabetes with unspecified complication, and other bone involvement in disease classified elsewhere.

<sup>3</sup> Includes all other health care use that is not a known comorbidity of diabetes.

\* Numbers do not necessarily sum to totals because of rounding.

**Supplementary Table A-6. Per capita health resource use attributed to diabetes in the U.S., by race/ethnicity and type of service, 2017 (in actual units)**

| Health resource                   | Race/ethnicity   |                 |                 |                      |                     |
|-----------------------------------|------------------|-----------------|-----------------|----------------------|---------------------|
|                                   | NHW<br>(N=15.1M) | NHB<br>(N=4.0M) | NHO<br>(N=1.9M) | Hispanic<br>(N=3.7M) | Total*<br>(N=24.7M) |
| Hospital inpatient days           | 0.92             | 1.18            | 0.78            | 0.67                 | 0.91                |
| Nursing/residential facility days | 2.87             | 2.41            | 0.71            | 0.79                 | 2.32                |
| Hospice days                      | 0.01             | 0.01            | 0.01            | 0.01                 | 0.01                |
| Physician office visits           | 5.21             | 4.25            | 4.44            | 4.69                 | 4.92                |
| Emergency department visits       | 0.26             | 0.48            | 0.14            | 0.29                 | 0.29                |
| Hospital outpatient visits        | 0.49             | 0.81            | 0.28            | 0.64                 | 0.55                |
| Home health visits                | 0.41             | 0.41            | 0.41            | 0.41                 | 0.41                |
| Medication prescriptions          | 29.19            | 25.20           | 21.17           | 22.25                | 26.89               |

Data source: NIS (2014), MCBS (2013), CMS MDS (2015), NAMCS (2013-2015), NHAMCS (2012-2014), MEPS (2011-2015) and NHHCS (2007). NHW=non-Hispanic white, NHB=non-Hispanic black and NHO=non-Hispanic other races.

\* Numbers do not necessarily sum to totals because of rounding.

SUPPLEMENTARY DATA

**Supplementary Table A-7. Per capita health resource use attributed to diabetes in the U.S., by insurance status and type of service, 2017 (in actual units)**

| Health resource                   | Insurance Status    |                         |                       |                     |
|-----------------------------------|---------------------|-------------------------|-----------------------|---------------------|
|                                   | Private<br>(N=8.8M) | Government<br>(N=14.6M) | Uninsured<br>(N=1.4M) | Total*<br>(N=24.7M) |
| Hospital inpatient days           | 0.48                | 1.23                    | 0.51                  | 0.91                |
| Nursing/residential facility days | 2.32                | 2.32                    | 2.32                  | 2.32                |
| Hospice days                      | 0.01                | 0.01                    | 0.01                  | 0.01                |
| Physician office visits           | 4.47                | 5.51                    | 1.78                  | 4.92                |
| Emergency department visits       | 0.19                | 0.33                    | 0.51                  | 0.29                |
| Hospital outpatient visits        | 0.38                | 0.64                    | 0.67                  | 0.55                |
| Home health visits                | 0.41                | 0.41                    | 0.41                  | 0.41                |
| Antidiabetic agents               | 5.24                | 4.39                    | 3.54                  | 4.65                |
| Medication prescriptions          | 20.28               | 32.75                   | 9.77                  | 26.89               |

Data source: NIS (2014), MCBS (2013), CMS MDS (2015), NAMCS (2013-2015), NHAMCS (2012-2014), MEPS (2011-2015) and NHHCS (2007).

\* Numbers do not necessarily sum to totals because of rounding.

**Supplementary Table A-8. Per capita health care expenditures attributed to diabetes in the U.S., by insurance status and type of service, 2017 (in actual dollars)**

| Cost Component                              | Insurance Status    |                         |                       |                     |
|---------------------------------------------|---------------------|-------------------------|-----------------------|---------------------|
|                                             | Private<br>(N=8.8M) | Government<br>(N=14.6M) | Uninsured<br>(N=1.4M) | Total*<br>(N=24.7M) |
| <b>Institutional care</b>                   |                     |                         |                       |                     |
| Hospital inpatient                          | 1,796               | 3,611                   | 1,383                 | 2,819               |
| Nursing/residential facility                | 261                 | 261                     | 261                   | 261                 |
| Hospice                                     | 3                   | 3                       | 3                     | 3                   |
| <b>Outpatient care</b>                      |                     |                         |                       |                     |
| Physician office                            | 1,290               | 1,256                   | 254                   | 1,213               |
| Emergency department                        | 366                 | 287                     | 419                   | 323                 |
| Ambulance services <sup>1</sup>             | 13                  | 13                      | 13                    | 13                  |
| Hospital outpatient                         | 588                 | 449                     | 218                   | 488                 |
| Home health <sup>1</sup>                    | 137                 | 137                     | 137                   | 137                 |
| Podiatry <sup>1</sup>                       | 10                  | 10                      | 10                    | 10                  |
| <b>Outpatient medications and supplies</b>  |                     |                         |                       |                     |
| Insulin                                     | 385                 | 790                     | 169                   | 607                 |
| Diabetic supplies <sup>1</sup>              | 151                 | 151                     | 151                   | 151                 |
| Other anti-diabetic agents <sup>2</sup>     | 527                 | 749                     | 188                   | 641                 |
| Prescription medications                    | 2,759               | 3,219                   | 177                   | 2,882               |
| Other equipment and supplies <sup>3,1</sup> | 53                  | 53                      | 53                    | 53                  |
| <b>Total</b>                                | <b>8,338</b>        | <b>10,998</b>           | <b>3,436</b>          | <b>9,601</b>        |

Data source: NIS (2014), MCBS (2013), CMS MDS (2015), NAMCS (2013-2015), NHAMCS (2012-2014), MEPS (2011-2015), NHHCS (2007), NHIS (2014-2016), and U.S. Census Bureau (2016 & 2017).

<sup>1</sup> Estimates are unavailable by insurance type.

<sup>2</sup> Includes oral medications and non-insulin injectable anti-diabetic agents.

<sup>3</sup> Includes, but not limited to eyewear, orthopedic items, hearing devices, prosthesis, bathroom aids, medical equipment, and disposable supplies.

\* Numbers do not necessarily sum to totals because of rounding.

SUPPLEMENTARY DATA

*Supplementary Table A-9. Per capita health care expenditures attributed to diabetes in the U.S., by age group and type of service, 2017 (in actual dollars)*

| Cost Component                             | Age (years)      |                    |                   |                     |
|--------------------------------------------|------------------|--------------------|-------------------|---------------------|
|                                            | < 45<br>(N=3.0M) | 45-64<br>(N=10.7M) | ≥ 65<br>(N=11.0M) | Total*<br>(N=24.7M) |
| <b>Institutional care</b>                  |                  |                    |                   |                     |
| Hospital inpatient                         | 1,497            | 1,903              | 4,069             | 2,819               |
| Nursing/residential facility               | 166              | 194                | 351               | 261                 |
| Hospice                                    | 0.02             | 0.55               | 5                 | 3                   |
| <b>Outpatient care</b>                     |                  |                    |                   |                     |
| Physician office                           | 626              | 721                | 1,852             | 1,213               |
| Emergency department                       | 504              | 255                | 339               | 323                 |
| Ambulance services                         | 2                | 9                  | 21                | 13                  |
| Hospital outpatient                        | 462              | 367                | 611               | 488                 |
| Home health                                | 175              | 193                | 73                | 137                 |
| Podiatry                                   | 4                | 8                  | 14                | 10                  |
| <b>Outpatient medications and supplies</b> |                  |                    |                   |                     |
| Insulin                                    | 767              | 611                | 558               | 607                 |
| Diabetic supplies                          | 175              | 163                | 132               | 151                 |
| Other anti-diabetic agents <sup>1</sup>    | 480              | 657                | 671               | 641                 |
| Prescription medications                   | 1,061            | 1,734              | 4,496             | 2,882               |
| Other equipment and supplies <sup>2</sup>  | 60               | 56                 | 48                | 53                  |
| <b>Total</b>                               | <b>5,979</b>     | <b>6,874</b>       | <b>13,240</b>     | <b>9,601</b>        |

Data source: NIS (2014), MCBS (2013), CMS MDS (2015), NAMCS (2013-2015), NHAMCS (2012-2014), MEPS (2011-2015), NHHCS (2007), NHIS (2014-2016), and U.S. Census Bureau (2016 & 2017).

<sup>1</sup> Includes oral medications and non-insulin injectable anti-diabetic agents.

<sup>2</sup> Includes, but not limited to eyewear, orthopedic items, hearing devices, prosthesis, bathroom aids, medical equipment, and disposable supplies.

\* Numbers do not necessarily sum to totals because of rounding.



SUPPLEMENTARY DATA

**Supplementary Table A-10. Per capita health care expenditures attributed to diabetes in the U.S., by race/ethnicity and type of service, 2017 (in actual dollars)**

| Cost Component                              | Race/ethnicity   |                 |                 |                      |                     |
|---------------------------------------------|------------------|-----------------|-----------------|----------------------|---------------------|
|                                             | NHW<br>(N=15.1M) | NHB<br>(N=4.0M) | NHO<br>(N=1.9M) | Hispanic<br>(N=3.7M) | Total*<br>(N=24.7M) |
| <b>Institutional care</b>                   |                  |                 |                 |                      |                     |
| Hospital inpatient                          | 2,866            | 3,521           | 2,481           | 2,036                | 2,819               |
| Nursing/residential facility                | 323              | 271             | 80              | 89                   | 261                 |
| Hospice                                     | 3                | 3               | 1               | 2                    | 3                   |
| <b>Outpatient care</b>                      |                  |                 |                 |                      |                     |
| Physician office                            | 1,294            | 1,046           | 1,070           | 1,143                | 1,213               |
| Emergency department                        | 291              | 531             | 149             | 318                  | 323                 |
| Ambulance services <sup>1</sup>             | 13               | 13              | 13              | 13                   | 13                  |
| Hospital outpatient                         | 446              | 708             | 253             | 537                  | 488                 |
| Home health <sup>1</sup>                    | 137              | 137             | 137             | 137                  | 137                 |
| Podiatry <sup>1</sup>                       | 10               | 10              | 10              | 10                   | 10                  |
| <b>Outpatient medications and supplies</b>  |                  |                 |                 |                      |                     |
| Insulin                                     | 603              | 695             | 489             | 586                  | 607                 |
| Diabetic supplies                           | 167              | 138             | 167             | 90                   | 151                 |
| Other anti-diabetic agents <sup>2</sup>     | 628              | 645             | 719             | 651                  | 641                 |
| Prescription medications                    | 3,130            | 2,702           | 2,269           | 2,385                | 2,882               |
| Other equipment and supplies <sup>3,1</sup> | 53               | 53              | 53              | 53                   | 53                  |
| <b>Total</b>                                | <b>9,963</b>     | <b>10,473</b>   | <b>7,892</b>    | <b>8,051</b>         | <b>9,601</b>        |

Data source: NIS (2014), MCBS (2013), CMS MDS (2015), NAMCS (2013-2015), NHAMCS (2012-2014), MEPS (2011-2015), NHHCS (2007), NHIS (2014-2016), and U.S. Census Bureau (2016 & 2017). NHW=non-Hispanic white, NHB=non-Hispanic black and NHO=non-Hispanic other races.

<sup>1</sup> Estimates are unavailable by race and Hispanic ethnicity.

<sup>2</sup> Includes oral medications and non-insulin injectable anti-diabetic agents.

<sup>3</sup> Includes, but not limited to eyewear, orthopedic items, hearing devices, prosthesis, bathroom aids, medical equipment, and disposable supplies.

\* Numbers do not necessarily sum to totals because of rounding.

SUPPLEMENTARY DATA

**Supplementary Table A-11. Total health care expenditures attributed to diabetes in the U.S., by insurance status and type of service, 2017 (in millions of dollars)**

| Cost Component                              | Insurance Status    |                         |                       |                     |
|---------------------------------------------|---------------------|-------------------------|-----------------------|---------------------|
|                                             | Private<br>(N=8.8M) | Government<br>(N=14.6M) | Uninsured<br>(N=1.4M) | Total*<br>(N=24.7M) |
| <b>Institutional care</b>                   |                     |                         |                       |                     |
| Hospital inpatient                          | 16,385              | 51,396                  | 1,879                 | 69,661              |
| Nursing/residential facility                | 2,376               | 3,708                   | 354                   | 6,439               |
| Hospice                                     | 23                  | 37                      | 3                     | 64                  |
| <b>Physician office</b>                     |                     |                         |                       |                     |
| Physician office                            | 11,765              | 17,880                  | 345                   | 29,990              |
| Emergency department                        | 3,334               | 4,087                   | 569                   | 7,990               |
| Ambulance services <sup>1</sup>             | 123                 | 191.22                  | 18                    | 332                 |
| Hospital outpatient                         | 5,367               | 6,386                   | 296                   | 12,049              |
| Home health <sup>1</sup>                    | 1,250               | 1,951                   | 186                   | 3,388               |
| Podiatry <sup>1</sup>                       | 93                  | 145                     | 14                    | 252                 |
| <b>Medications and supplies</b>             |                     |                         |                       |                     |
| Insulin                                     | 3,512               | 11,239                  | 230                   | 14,981              |
| Diabetic supplies <sup>1</sup>              | 1,374               | 2,144                   | 205                   | 3,723               |
| Other anti-diabetic agents <sup>2</sup>     | 4,802               | 10,796                  | 256                   | 15,855              |
| Prescription medications                    | 25,167              | 45,826                  | 243                   | 71,235              |
| Other equipment and supplies <sup>3,1</sup> | 484                 | 755                     | 72                    | 1,310               |
| <b>Total</b>                                | <b>76,056</b>       | <b>156,542</b>          | <b>4,671</b>          | <b>237,269</b>      |

Data source: NIS (2014), MCBS (2013), CMS MDS (2015), NAMCS (2013-2015), NHAMCS (2012-2014), MEPS (2011-2015), NHHCS (2007), NHIS (2014-2016), and U.S. Census Bureau (2016 & 2017).

<sup>1</sup> Estimates are unavailable by insurance type.

<sup>2</sup> Includes oral medications and non-insulin injectable anti-diabetic agents.

<sup>3</sup> Includes, but not limited to eyewear, orthopedic items, hearing devices, prosthesis, bathroom aids, medical equipment, and disposable supplies.

\* Numbers do not necessarily sum to totals because of rounding.

SUPPLEMENTARY DATA

**Supplementary Table A-12. Health care expenditures attributed to diabetes in the U.S., by medical condition and type of service, 2017 (in millions of dollars)**

| Type of Service      | Diabetes | Chronic Complications <sup>1</sup> |                     |                |       |           |            |                    | General Medical <sup>3</sup> | Total* |
|----------------------|----------|------------------------------------|---------------------|----------------|-------|-----------|------------|--------------------|------------------------------|--------|
|                      |          | Neurological                       | Peripheral Vascular | Cardiovascular | Renal | Metabolic | Ophthalmic | Other <sup>2</sup> |                              |        |
| Hospital inpatient   | 2,067    | 5,808                              | 3,762               | 20,231         | 3,404 | 205       | 50         | 4,304              | 29,830                       | 69,661 |
| Physician office     | 5,626    | 633                                | 687                 | 3,671          | 1,494 | 314       | 2,253      | 393                | 14,920                       | 29,990 |
| Emergency department | 417      | 134                                | 139                 | 916            | 409   | 36        | 26         | 640                | 5,273                        | 7,990  |
| Hospital outpatient  | 2,626    | 203                                | 500                 | 947            | 505   | 37        | 551        | 766                | 5,914                        | 12,049 |
| Retail prescriptions | 18,560   | 1,827                              | 1,469               | 11,486         | 2,925 | 963       | 2,710      | 1,089              | 30,207                       | 71,235 |

Data source: NIS (2014), NAMCS (2013-2015), NHAMCS (2012-2014) and MEPS (2011-2015).

<sup>1</sup> See Supplementary Appendix 2 for diagnosis codes for each category of complications.

<sup>2</sup> Includes bacteremia, candidiasis of skin and nails, chronic osteomyelitis of the foot, other and unspecified noninfectious gastroenteritis and colitis, impotence of organic origin, infective otitis externa, degenerative skin disorders, candidiasis of vulva and vagina, cellulitis, diabetes with other specified manifestations, diabetes with unspecified complication, and other bone involvement in disease classified elsewhere.

<sup>3</sup> Includes all other health care use that is not a known comorbidity of diabetes.

\* Numbers do not necessarily sum to totals because of rounding.

**Supplementary Table A-13. Annual productivity loss per person with diabetes, by cause and race/ethnicity, 2017 (in billions of dollars)**

|                                                        | Race/ethnicity <sup>1</sup> |                 |                 |                      |
|--------------------------------------------------------|-----------------------------|-----------------|-----------------|----------------------|
|                                                        | NHW<br>(N=14.1M)            | NHB<br>(N=3.4M) | NHO<br>(N=1.4M) | Hispanic<br>(N=3.4M) |
| Work days absent                                       | 2.2                         | 0.5             | 0.2             | 0.4                  |
| Reduced performance at work                            | 18.0                        | 3.3             | 2.3             | 3.4                  |
| Reduced productivity days for those not in labor force | 1.3                         | 0.5             | 0.2             | 0.3                  |
| Reduced labor force participation due to disability    | 17.9                        | 11.0            | 3.0             | 5.5                  |
| Mortality                                              | 14.3                        | 4.0             | 0.9             | 1.8                  |
| <b>Total annual indirect cost</b>                      | <b>53.8</b>                 | <b>19.3</b>     | <b>6.6</b>      | <b>11.4</b>          |
| <b>Total Per Capita Indirect cost<sup>2</sup></b>      | <b>3,585</b>                | <b>4,829</b>    | <b>3,320</b>    | <b>2,843</b>         |

Data source: Analysis of the NHIS (2014-2016), CPS (2016), CDC mortality data (2015), and Census Bureau 2015-2017).

<sup>1</sup> Non-Hispanic white (NHW), non-Hispanic black (NHB), non-Hispanic other (NH), and Hispanic. <sup>2</sup> In actual dollars.

SUPPLEMENTARY DATA

**Supplementary Table A-14. Annual productivity loss per person with diabetes in the U.S., by age, sex, and cause, 2017 (in actual dollars)**

| Sex               | Age          | Absenteeism  | Presenteeism | Reduced productivity for those not in labor force | Unemployment from disability | Premature mortality | Total annual burden* |
|-------------------|--------------|--------------|--------------|---------------------------------------------------|------------------------------|---------------------|----------------------|
| Male              | 18-34        | 10           | 1,670        | <10                                               | 1,170                        | 3,130               | 5,980                |
|                   | 35-44        | 210          | 2,850        | 60                                                | 1,820                        | 2,760               | 7,700                |
|                   | 45-54        | 330          | 2,770        | 110                                               | 2,070                        | 2,850               | 8,130                |
|                   | 55-59        | 540          | 2,040        | 270                                               | 2,640                        | 1,530               | 7,020                |
|                   | 60-64        | 210          | 1,830        | 170                                               | 1,710                        | 530                 | 4,450                |
|                   | 65-69        | 80           | 950          | -                                                 | 710                          | 200                 | 1,940                |
|                   | 70+          | -            | 590          | -                                                 | 1,480                        | -                   | 2,070                |
|                   | <b>Total</b> | <b>180</b>   | <b>1,600</b> | <b>80</b>                                         | <b>1,660</b>                 | <b>1,120</b>        | <b>4,640</b>         |
| Female            | 18-34        | 10           | 840          | 10                                                | 1,310                        | 1,350               | 3,520                |
|                   | 35-44        | 120          | 1,290        | 100                                               | 1,920                        | 1,440               | 4,870                |
|                   | 45-54        | 170          | 1,150        | 160                                               | 2,070                        | 1,230               | 4,780                |
|                   | 55-59        | 250          | 730          | 350                                               | 2,510                        | 550                 | 4,390                |
|                   | 60-64        | 90           | 610          | 200                                               | 1,670                        | 180                 | 2,750                |
|                   | 65-69        | 30           | 270          | -                                                 | 690                          | 60                  | 1,050                |
|                   | 70+          | -            | 60           | -                                                 | 640                          | -                   | 700                  |
|                   | <b>Total</b> | <b>80</b>    | <b>550</b>   | <b>110</b>                                        | <b>1,380</b>                 | <b>470</b>          | <b>2,590</b>         |
| <b>All adults</b> | <b>130</b>   | <b>1,090</b> | <b>90</b>    | <b>1,530</b>                                      | <b>810</b>                   | <b>3,640</b>        |                      |

Data source: Analysis of the NHIS (2014-2016), CPS (2016), and CDC mortality data (2015).

Note: No indirect costs are calculated for persons under the age of 18. For the age 70 and older population, the rate of labor force participation is low so indirect costs are relatively low for this population despite high prevalence of diabetes. The NHIS sample size of employed people over age 70 is small, and regression analysis with the NHIS found that diabetes is not associated with increased work days absent for illness among the employed population age 70 and older. We conservatively assume that for the population age 65 and older and not in the workforce there is no loss in societal productivity (e.g., from volunteer work) associated with diabetes.

\* Numbers do not necessarily sum to totals because of rounding\

## SUPPLEMENTARY DATA

Figure A-1 summarizes estimates of present value of future productivity (PVFP) if a person dies at that age. PVFP is the value in 2017 of expected future lifetime earnings if the person had lived to the average age as the cohort born in the same year. Differences in PVFP by demographic reflect differences in average earnings, propensity to be in the workforce, and number of years expecting to remain in the workforce.

**Supplementary Figure A-1. Net Present Value of Future Lost Earnings from Premature Death**

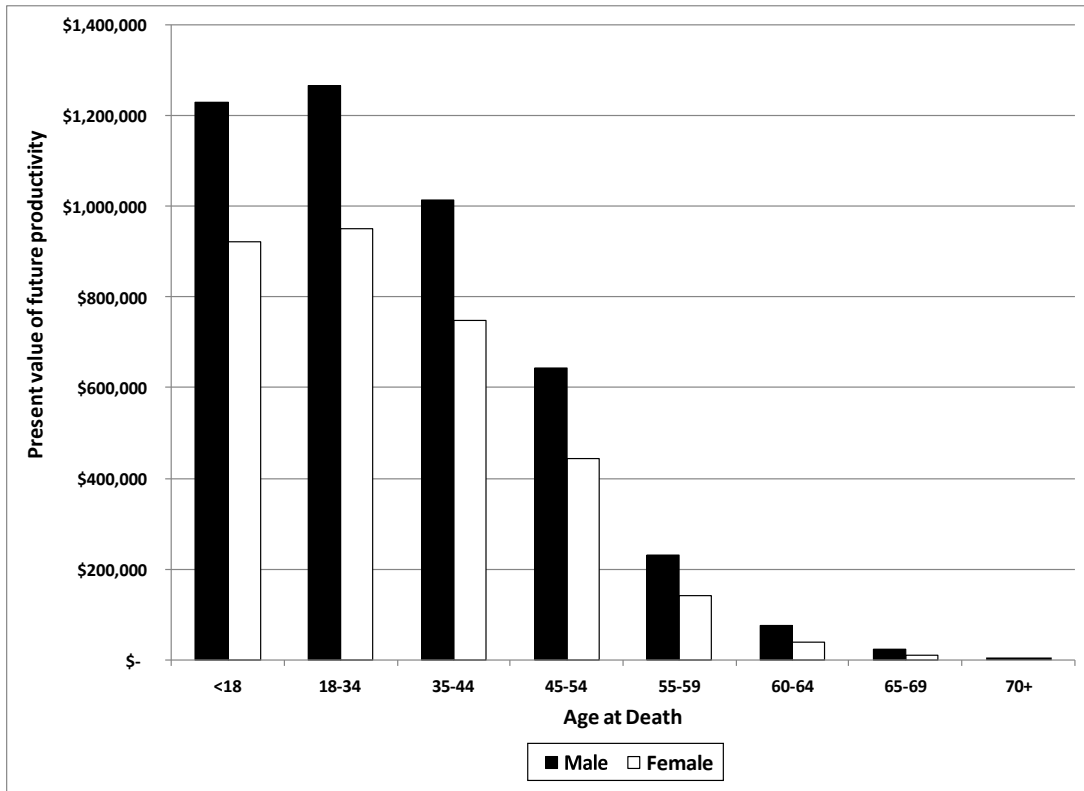

Data source: Analysis of the NHIS (2014-2016), CPS (2016), and CDC mortality data (2015).

SUPPLEMENTARY DATA

**Supplementary Table A-15. Proportion of total health resource use attributed to diabetes in the U.S. by medical condition and type of service, 2017**

| Medical Event               | Diabetes | Chronic Complications <sup>1</sup> |                     |                |       |           |            |                    | General Medical <sup>3</sup> | Average |
|-----------------------------|----------|------------------------------------|---------------------|----------------|-------|-----------|------------|--------------------|------------------------------|---------|
|                             |          | Neurological                       | Peripheral Vascular | Cardiovascular | Renal | Metabolic | Ophthalmic | Other <sup>2</sup> |                              |         |
| Hospital inpatient days     | 100%     | 38%                                | 49%                 | 34%            | 29%   | 44%       | 31%        | 49%                | 8%                           | 14%     |
| Hospital outpatient visits  | 100%     | 33%                                | 28%                 | 20%            | 28%   | 13%       | 27%        | 18%                | 8%                           | 13%     |
| Emergency department visits | 100%     | 21%                                | 20%                 | 19%            | 13%   | 35%       | 17%        | 12%                | 4%                           | 5%      |
| Physician office visits     | 100%     | 37%                                | 35%                 | 21%            | 25%   | 13%       | 29%        | 22%                | 6%                           | 12%     |
| Prescription medications    | 100%     | 46%                                | 37%                 | 21%            | 33%   | 13%       | 27%        | 21%                | 10%                          | 17%     |

Data source: NIS (2014), MCBS (2013), CMS MDS (2015), NAMCS (2013-2015), NHAMCS (2012-2014), MEPS (2011-2015), NHHCS (2007), NHIS (2014-2016) and U.S. Census Bureau (2016 & 2017).

<sup>1</sup> See Supplementary Appendix 2 for diagnosis codes for each category of complications.

<sup>2</sup> Includes bacteremia, candidiasis of skin and nails, chronic osteomyelitis of the foot, other and unspecified noninfectious gastroenteritis and colitis, impotence of organic origin, infective otitis externa, degenerative skin disorders, candidiasis of vulva and vagina, cellulitis, diabetes with other specified manifestations, diabetes with unspecified complication, and other bone involvement in disease classified elsewhere.

<sup>3</sup> Includes all other health care use that is not a known comorbidity of diabetes.

**Estimating the direct and indirect costs attributed to diabetes by state**

State-specific cost of diabetes was calculated by combining the population with diabetes in each state by age-sex-race/ethnicity stratum with the overall U.S. per capita expenditure attributed to diabetes by each aforementioned stratum. State-specific diabetes prevalence is estimated by applying a statistical matching procedure to match each person in the 2016 ACS with a person in the 2015 or 2016 BRFSS (community-based population) or an institutionalized person in the 2013 MCBS (residential care facility) or 2015 MDS (nursing home).

National estimates of diabetes costs by demographic and insurance strata were applied to the state diabetes prevalence estimates. This cost is further adjusted by the state-specific healthcare cost of living index published by Missouri Economic Research and Information Center (MERIC) for 2017.

Per capita indirect cost attributed to diabetes includes costs due to absenteeism, presenteeism, reduced productivity for those not in labor force, unemployment from disability and premature mortality. Similar to the methodology employed to estimate state-specific medical costs, per capita indirect cost and diabetes prevalence for each state are combined to estimate state-specific indirect costs owing to loss of productivity due to diabetes. Indirect cost was adjusted by overall cost of living index published by MERIC for 2017.

Table A-16 summarizes state diabetes prevalence and diabetes burden, with states sorted from largest total burden (California) to smallest total burden (Wyoming). California has the largest population with diabetes and thus incurs the largest cost (\$39.47 billion). West Virginia has the highest prevalence rate of diabetes (10.1%).

SUPPLEMENTARY DATA

*Supplementary Table A-16. State level prevalence and cost burden of diabetes, 2017*

| State          | Prevalence | Population with Diabetes | Costs (Billions \$) |          |       |
|----------------|------------|--------------------------|---------------------|----------|-------|
|                |            |                          | Medical             | Indirect | Total |
| California     | 6.9%       | 2,764,000                | 27.02               | 12.45    | 39.47 |
| Texas          | 7.6%       | 2,163,000                | 18.91               | 6.70     | 25.60 |
| Florida        | 9.3%       | 1,944,000                | 19.32               | 5.48     | 24.80 |
| New York       | 7.4%       | 1,474,000                | 15.14               | 6.09     | 21.23 |
| Pennsylvania   | 7.8%       | 1,006,000                | 9.34                | 3.54     | 12.88 |
| Ohio           | 8.4%       | 970,000                  | 9.02                | 3.33     | 12.35 |
| Illinois       | 7.0%       | 902,000                  | 8.73                | 3.17     | 11.89 |
| Georgia        | 8.2%       | 853,000                  | 7.78                | 3.14     | 10.92 |
| North Carolina | 7.8%       | 798,000                  | 7.71                | 2.90     | 10.61 |
| Michigan       | 7.7%       | 762,000                  | 7.03                | 2.69     | 9.72  |
| New Jersey     | 6.8%       | 616,000                  | 6.66                | 2.51     | 9.17  |
| Virginia       | 7.5%       | 639,000                  | 6.05                | 2.33     | 8.38  |
| Massachusetts  | 6.6%       | 449,000                  | 5.49                | 2.13     | 7.62  |
| Tennessee      | 8.8%       | 592,000                  | 5.16                | 2.11     | 7.26  |
| Maryland       | 8.1%       | 496,000                  | 4.92                | 2.09     | 7.01  |
| Arizona        | 7.8%       | 555,000                  | 5.11                | 1.65     | 6.76  |
| Washington     | 6.4%       | 473,000                  | 5.04                | 1.69     | 6.74  |
| Missouri       | 8.7%       | 535,000                  | 4.92                | 1.80     | 6.71  |
| Indiana        | 7.7%       | 512,000                  | 4.70                | 1.79     | 6.49  |
| Alabama        | 9.9%       | 483,000                  | 4.19                | 1.72     | 5.90  |
| South Carolina | 8.8%       | 441,000                  | 4.25                | 1.64     | 5.89  |
| Louisiana      | 9.3%       | 441,000                  | 4.23                | 1.45     | 5.68  |
| Wisconsin      | 6.7%       | 389,000                  | 4.10                | 1.36     | 5.46  |
| Kentucky       | 9.2%       | 411,000                  | 3.60                | 1.57     | 5.16  |
| Minnesota      | 6.1%       | 339,000                  | 3.53                | 1.17     | 4.70  |
| Oregon         | 6.9%       | 285,000                  | 3.14                | 1.17     | 4.31  |
| Oklahoma       | 8.2%       | 322,000                  | 2.76                | 1.07     | 3.83  |
| Connecticut    | 6.6%       | 236,000                  | 2.70                | 0.96     | 3.66  |
| Colorado       | 4.8%       | 270,000                  | 2.56                | 1.03     | 3.59  |
| Mississippi    | 9.3%       | 278,000                  | 2.42                | 0.99     | 3.41  |
| Arkansas       | 8.8%       | 262,000                  | 2.21                | 0.88     | 3.09  |
| Nevada         | 6.8%       | 205,000                  | 2.04                | 0.70     | 2.75  |
| Iowa           | 6.4%       | 199,000                  | 1.90                | 0.65     | 2.55  |
| Kansas         | 6.6%       | 194,000                  | 1.70                | 0.69     | 2.40  |
| West Virginia  | 10.1%      | 184,000                  | 1.66                | 0.64     | 2.30  |
| New Mexico     | 8.2%       | 174,000                  | 1.50                | 0.48     | 1.97  |
| Utah           | 4.8%       | 148,000                  | 1.25                | 0.50     | 1.75  |
| Hawaii         | 6.9%       | 99,000                   | 1.02                | 0.46     | 1.48  |
| Nebraska       | 5.9%       | 112,000                  | 0.99                | 0.38     | 1.38  |
| Maine          | 6.9%       | 89,000                   | 1.01                | 0.37     | 1.37  |
| Idaho          | 6.2%       | 104,000                  | 0.96                | 0.31     | 1.27  |
| New Hampshire  | 6.5%       | 86,000                   | 0.94                | 0.32     | 1.26  |
| Rhode Island   | 7.1%       | 75,000                   | 0.78                | 0.28     | 1.06  |
| Delaware       | 7.5%       | 72,000                   | 0.70                | 0.28     | 0.98  |

SUPPLEMENTARY DATA

| State                | Prevalence  | Population with Diabetes | Costs (Billions \$) |             |              |
|----------------------|-------------|--------------------------|---------------------|-------------|--------------|
|                      |             |                          | Medical             | Indirect    | Total        |
| Montana              | 6.2%        | 64,000                   | 0.63                | 0.19        | 0.82         |
| District of Columbia | 6.1%        | 42,000                   | 0.43                | 0.27        | 0.70         |
| South Dakota         | 6.5%        | 55,000                   | 0.51                | 0.18        | 0.69         |
| North Dakota         | 6.6%        | 49,000                   | 0.47                | 0.19        | 0.66         |
| Alaska               | 4.7%        | 34,000                   | 0.42                | 0.16        | 0.57         |
| Vermont              | 5.7%        | 35,000                   | 0.36                | 0.16        | 0.52         |
| Wyoming              | 5.8%        | 34,000                   | 0.31                | 0.11        | 0.42         |
| <b>U.S. Total *</b>  | <b>7.6%</b> | <b>24,714,0</b>          | <b>237.3</b>        | <b>89.9</b> | <b>327.2</b> |

Data source: NIS (2014), MCBS (2013), CMS MDS (2015), NAMCS (2013-2015), NHAMCS (2012-2014), MEPS (2011-2015), NHHCS (2007), NHIS (2014-2016), ACS (2016), BRFSS (2015-2016), and U.S. Census Bureau (2016 & 2017).

\* Numbers do not necessarily sum to totals because of rounding.



## Appendix 2. Chronic Complications of Diabetes and Diagnosis Codes

| Chronic Complications of Diabetes                                       | ICD-9 codes | ICD-10 codes                                                                                                                                                                                                                                                                                                                                                                                                                                                                                                                                                                                                                                                                                                                                   |
|-------------------------------------------------------------------------|-------------|------------------------------------------------------------------------------------------------------------------------------------------------------------------------------------------------------------------------------------------------------------------------------------------------------------------------------------------------------------------------------------------------------------------------------------------------------------------------------------------------------------------------------------------------------------------------------------------------------------------------------------------------------------------------------------------------------------------------------------------------|
| <b>Neurological Symptoms</b>                                            |             |                                                                                                                                                                                                                                                                                                                                                                                                                                                                                                                                                                                                                                                                                                                                                |
| Myasthetic syndromes in diseases classified elsewhere (amyotrophy)      | 358.1       | G733, G737                                                                                                                                                                                                                                                                                                                                                                                                                                                                                                                                                                                                                                                                                                                                     |
| Other specified idiopathic peripheral neuropathy                        | 356.8       | G608                                                                                                                                                                                                                                                                                                                                                                                                                                                                                                                                                                                                                                                                                                                                           |
| Mononeuritis of upper and lower limbs                                   | 354, 355    | G5620, G5642, G5622, G587, G5690, G5680, G5612, G5610, G580, G5692, G5630, G5602, G5632, G5621, G5682, G5641, G5600, G5691, G5611, G5640, G5681, G5601, G5631, G5780, G5712, G5732, G5782, G5700, G5792, G5702, G5762, G5721, G5791, G589, G5770, G5750, G5761, G5701, G5740, G5731, G5752, G5711, G5781, G5720, G5772, G5771, G59, G5722, G588, G5751, G5742, G5710, G5790, G5741, G5760, G5730, G5643, G5603, G5693, G5683, G5713, G5753, G5773, G5783, G5793, G589                                                                                                                                                                                                                                                                          |
| Arthropathy associated w/neurological disorders (Charcot's arthropathy) | 713.5       | M14632, M14629, M14662, M14649, M14641, M14612, M14621, M14611, M14661, M14669, M1469, M14619, M14672, M14642, M14671, M14652, M14631, M1468, M14659, M14622, M14639, M1460, M14651, M14679, M14812, M14819, M14821, M14822, M14829, M14831, M14832, M14839, M14841, M14842, M14849, M14851, M14852, M14859, M14861, M14862, M14869, M14871, M14872, M14879, M1488, M1489                                                                                                                                                                                                                                                                                                                                                                      |
| Peripheral autonomic neuropathy                                         | 337.1       | G990                                                                                                                                                                                                                                                                                                                                                                                                                                                                                                                                                                                                                                                                                                                                           |
| Polyneuropathy in diabetes                                              | 357.2       | E1042, E1043, E1142, E1143, E1342, E1343                                                                                                                                                                                                                                                                                                                                                                                                                                                                                                                                                                                                                                                                                                       |
| Neuralgia, neuritis, and radiculitis, unspecified                       | 729.2       | M792, M5418, M5410, M542, M5400, M5401, M5402, M5403, M5404, M5405, M5406, M5407, M5408, M5409, M5481, M5414, M5415, M5416, M5417, M545                                                                                                                                                                                                                                                                                                                                                                                                                                                                                                                                                                                                        |
| Diabetes with neurological complications                                | 250.6       | E1040, E1041, E1044, E1049, E1140, E1141, E1144, E1149, E1340, E1341, E1343, E1344, E1349, E10610, E11610, E13610                                                                                                                                                                                                                                                                                                                                                                                                                                                                                                                                                                                                                              |
| Occlusion of cerebral arteries                                          | 434         | I6621, I63313, I63323, I63429, I63522, I63432, I63331, I63333, I63343, I63542, I63311, I63449, I63541, I6349, I6602, I6612, I63319, I639, I63412, I6350, I6629, I6623, I669, I63521, I663, I63339, I63411, I63322, I63342, I668, I63413, I63419, I63423, I63433, I63513, I63529, I63341, I63321, I63532, I6611, I6340, I6613, I6601, I63431, I63439, I63312, I6339, I63512, I63549, I63422, I638, I63442, I63349, I6619, I63329, I63511, I63523, I63533, I63543, I636, I63421, I63519, I63539, I63531, I6359, I6603, I6609, I63441, I63332, I6622, I6330                                                                                                                                                                                       |
| Hemorrhagic stroke                                                      | 430-432     | I6031, I6032, I6002, I6011, I602, I6050, I604, I6052, I6051, I6010, I6012, I6000, I607, I606, I6030, I608, I609, I610, I611, I612, I613, I614, I615, I616, I618, I619, I6202, I6203, I6201, I621, I629, I6200                                                                                                                                                                                                                                                                                                                                                                                                                                                                                                                                  |
| Late effects of cerebrovascular disease                                 | 438         | I69351, I69090, I69243, I69041, I69169, I69943, I69869, I69021, I69839, I69923, I69992, I69965, I69390, I69265, I69853, I69221, I69941, I69354, I69023, I69120, I69153, I69944, I69292, I69244, I69341, I69092, I69065, I69049, I69820, I69262, I69359, I69044, I69241, I69142, I69139, I69223, I69043, I69062, I69398, I69322, I69859, I69962, I69343, I69949, I69921, I69321, I69349, I69822, I69854, I69122, I69249, I69842, I69993, I69344, I69991, I69851, I69198, I6920, I69362, I69963, I69144, I69093, I69841, I69064, I69293, I69232, I69159, I69151, I69932, I69233, I69261, I69898, I69141, I69032, I69192, I69063, I69934, I69890, I69933, I69031, I69091, I69228, I69165, I69154, I69332, I69121, I69231, I69323, I69392, I69252, |

SUPPLEMENTARY DATA

| Chronic Complications of Diabetes               | ICD-9 codes | ICD-10 codes                                                                                                                                                                                                                                                                                                                                                                                                                                                                                                                                                                                                                                                                                                                                                                                                                                                                                                                                                                                                                                                                                                                                                                                                                                                                                                                                                                                                                                                                                                                                                                                                                                                                                                                                                                                                                                                                                                                     |
|-------------------------------------------------|-------------|----------------------------------------------------------------------------------------------------------------------------------------------------------------------------------------------------------------------------------------------------------------------------------------------------------------------------------------------------------------------------------------------------------------------------------------------------------------------------------------------------------------------------------------------------------------------------------------------------------------------------------------------------------------------------------------------------------------------------------------------------------------------------------------------------------------------------------------------------------------------------------------------------------------------------------------------------------------------------------------------------------------------------------------------------------------------------------------------------------------------------------------------------------------------------------------------------------------------------------------------------------------------------------------------------------------------------------------------------------------------------------------------------------------------------------------------------------------------------------------------------------------------------------------------------------------------------------------------------------------------------------------------------------------------------------------------------------------------------------------------------------------------------------------------------------------------------------------------------------------------------------------------------------------------------------|
|                                                 |             | I69061, I69123, I69931, I69928, I69821, I69862, I6910, I69823, I69052, I69865, I69920, I69143, I6930, I69393, I69843, I69264, I69844, I69028, I69020, I69969, I69939, I69964, I69892, I69291, I69190, I69952, I69352, I69033, I69149, I69832, I69034, I69361, I69333, I6900, I69365, I69331, I69263, I69334, I69069, I69364, I69998, I69922, I69328, I69022, I69391, I69234, I69039, I69849, I69954, I69953, I69220, I69961, I69042, I69951, I6980, I69363, I69239, I6990, I69098, I69164, I69191, I69833, I69222, I69831, I69942, I69861, I69828, I69054, I69193, I69269, I69132, I69959, I69162, I69863, I69298, I69051, I69864, I69161, I69242, I69342, I69891, I69259, I69339, I69369, I69353, I69290, I69251, I69163, I69893, I69131, I69320, I69852, I69253, I69152, I69053, I69990, I69128, I69059, I69254, I69134, I69133, I69834, I69010, I69011, I69012, I69013, I69014, I69015, I69018, I69019, I69110, I69111, I69112, I69113, I69114, I69115, I69118, I69119, I69210, I69211, I69212, I69213, I69214, I69215, I69218, I69219, I69310, I69311, I69312, I69313, I69314, I69315, I69318, I69319, I69810, I69811, I69812, I69813, I69814, I69815, I69818, I69819, I69910, I69911, I69912, I69913, I69914, I69915, I69918, I69919                                                                                                                                                                                                                                                                                                                                                                                                                                                                                                                                                                                                                                                                                        |
| Occlusion of stenosis of pre-cerebral arteries  | 433         | I6329, I63239, I63031, I63033, I63013, I63019, I63219, I63112, I63113, I6300, I63132, I63133, I6501, I63111, I6509, I6312, I6522, I6302, I6503, I6320, I63139, I6319, I63119, I63131, I63012, I63039, I6309, I651, I6529, I63212, I659, I6502, I63232, I6521, I658, I63211, I6310, I63032, I6523, I63011, I6322, I63231, I63213, I63233                                                                                                                                                                                                                                                                                                                                                                                                                                                                                                                                                                                                                                                                                                                                                                                                                                                                                                                                                                                                                                                                                                                                                                                                                                                                                                                                                                                                                                                                                                                                                                                          |
| Other and ill-defined cerebrovascular disease   | 437         | G468, G466, G467, I675, I672, I674, I6781, I671, G465, G464, I679, I676, I688, G463, I6782, I677, I680, G454, I682                                                                                                                                                                                                                                                                                                                                                                                                                                                                                                                                                                                                                                                                                                                                                                                                                                                                                                                                                                                                                                                                                                                                                                                                                                                                                                                                                                                                                                                                                                                                                                                                                                                                                                                                                                                                               |
| Acute, but ill-defined, cerebrovascular disease | 436         | I6789                                                                                                                                                                                                                                                                                                                                                                                                                                                                                                                                                                                                                                                                                                                                                                                                                                                                                                                                                                                                                                                                                                                                                                                                                                                                                                                                                                                                                                                                                                                                                                                                                                                                                                                                                                                                                                                                                                                            |
| Transient ischemic attack (TIA)                 | 435         | G450, G451, G452, G458, G459, G460, G461, G462, I67848, I67841                                                                                                                                                                                                                                                                                                                                                                                                                                                                                                                                                                                                                                                                                                                                                                                                                                                                                                                                                                                                                                                                                                                                                                                                                                                                                                                                                                                                                                                                                                                                                                                                                                                                                                                                                                                                                                                                   |
| <b>Peripheral Vascular Disease</b>              |             |                                                                                                                                                                                                                                                                                                                                                                                                                                                                                                                                                                                                                                                                                                                                                                                                                                                                                                                                                                                                                                                                                                                                                                                                                                                                                                                                                                                                                                                                                                                                                                                                                                                                                                                                                                                                                                                                                                                                  |
| Atherosclerosis                                 | 440         | I70708, I70301, I70319, I70369, I70738, I70303, I70598, I70543, I7025, I70661, I70245, I70334, I70432, I70298, I70518, I70718, I70613, I708, I70768, I70603, I70633, I70663, I70743, I70218, I70628, I70402, I70568, I70345, I70523, I70268, I70461, I70508, I70693, I70411, I70309, I70399, I70723, I70634, I70339, I70331, I70669, I70631, I70549, I7045, I70541, I70639, I70601, I70609, I70744, I70242, I70792, I70521, I70691, I70741, I70413, I70493, I70243, I70463, I70619, I70342, I70431, I70712, I70244, I70491, I70322, I70419, I70428, I700, I70448, I70732, I70535, I70562, I70721, I70699, I70538, I70648, I70223, I70544, I70238, I70439, I70403, I70645, I70221, I70398, I70499, I70611, I70433, I7090, I70749, I70208, I70229, I70323, I70642, I70592, I70762, I70308, I70401, I70529, I70202, I70212, I70222, I70532, I70512, I70368, I70341, I70713, I70638, I70344, I70438, I70513, I70735, I70434, I70591, I7035, I70599, I70442, I70318, I70445, I70643, I70329, I70502, I70698, I7065, I70241, I70731, I70729, I70321, I70793, I70469, I70701, I7092, I70528, I70232, I70763, I70422, I70668, I70349, I70468, I70548, I70418, I70733, I70299, I70711, I70335, I70644, I70262, I70409, I70343, I70313, I70533, I70511, I70213, I70728, I70703, I70608, I70443, I70519, I70748, I70261, I70791, I70362, I70622, I70293, I70263, I70623, I70569, I70709, I70769, I70408, I70761, I70719, I70332, I70302, I701, I70498, I70702, I70799, I7075, I70228, I70201, I70534, I70235, I70234, I70629, I70501, I70412, I70291, I70392, I70292, I70641, I70231, I70692, I70545, I70621, I70338, I70219, I70509, I70722, I70561, I70249, I70734, I70444, I70539, I70612, I70441, I70563, I70531, I70449, I70503, I70593, I70393, I70211, I70423, I7055, I70462, I70312, I70618, I70635, I70361, I70745, I70328, I70209, I70742, I70348, I70492, I70233, I70363, I7091, I70435, I70522, I70649, I70602, I70269, I70542, |

SUPPLEMENTARY DATA

| Chronic Complications of Diabetes                                                             | ICD-9 codes             | ICD-10 codes                                                                                                                                                                                                                                                                                                                                                                                                                                                                                                                                                                                                                                                                                                                                                                                                                                                                                                                                                                                                                                                                                                                                                              |
|-----------------------------------------------------------------------------------------------|-------------------------|---------------------------------------------------------------------------------------------------------------------------------------------------------------------------------------------------------------------------------------------------------------------------------------------------------------------------------------------------------------------------------------------------------------------------------------------------------------------------------------------------------------------------------------------------------------------------------------------------------------------------------------------------------------------------------------------------------------------------------------------------------------------------------------------------------------------------------------------------------------------------------------------------------------------------------------------------------------------------------------------------------------------------------------------------------------------------------------------------------------------------------------------------------------------------|
|                                                                                               |                         | I70203, I70421, I70632, I70333, I70429, I70391, I70248, I70739, I70662, I70798, I70239, I70311                                                                                                                                                                                                                                                                                                                                                                                                                                                                                                                                                                                                                                                                                                                                                                                                                                                                                                                                                                                                                                                                            |
| Embolism and thrombosis, structure of artery                                                  | 444, 447.1              | I743, I744, I7401, I749, I7411, I7409, I7419, I7410, I748, I742, I745, I771                                                                                                                                                                                                                                                                                                                                                                                                                                                                                                                                                                                                                                                                                                                                                                                                                                                                                                                                                                                                                                                                                               |
| Other peripheral vascular disease                                                             | 443                     | I7381, I798, I7389, I7301, I7779, E0852, E0951, I7772, I7300, E0851, E0859, E0952, E0959, I731, I791, I7774, I7773, I7771, I739, I670                                                                                                                                                                                                                                                                                                                                                                                                                                                                                                                                                                                                                                                                                                                                                                                                                                                                                                                                                                                                                                     |
| Other disorders of circulatory system                                                         | 459                     | I87339, I87022, I87322, I87309, I998, I87021, I872, I87029, I87092, I87023, I87392, I87012, I87321, I871, I87302, I87093, I87323, I87329, I87033, I87013, I87001, I87002, I87032, I87312, I87091, I87003, I87099, R58, I879, I87303, I87011, I87311, I87332, I87393, I999, I87039, I87009, I87019, I87301, I87333, I87031, I87319, I87391, I87399, I878, I87331, I87313                                                                                                                                                                                                                                                                                                                                                                                                                                                                                                                                                                                                                                                                                                                                                                                                   |
| Phlebitis and thrombophlebitis, portal vein thrombosis and thrombolism and venous thrombolism | 451,452                 | I8010, I80223, I8000, I80221, I80292, I80202, I80232, I80212, I8002, I803, I8012, I809, I80229, I80213, I80219, I80233, I80211, I80293, I80231, I8013, I8001, I80201, I80239, I8011, I80203, I80291, I80209, I80299, I808, I80222, I8003, I81                                                                                                                                                                                                                                                                                                                                                                                                                                                                                                                                                                                                                                                                                                                                                                                                                                                                                                                             |
| Other venous embolism and thrombolism                                                         | 453                     | I82719, I8290, I82599, I82A29, I82701, I82291, I82441, I82A21, I82711, I82C22, I825Z3, I82511, I82539, I82211, I825Z9, I82501, I824Y2, I82A12, I82533, I82519, I82612, I82623, I825Z1, I82629, I82C21, I82503, I82709, I82443, I82703, I82412, I82602, I82531, I82542, I82492, I82621, I82449, I82890, I82A13, I82522, I82603, I82509, I82613, I82B22, I82421, I82220, I824Z2, I82423, I82C23, I82812, I82722, I8291, I820, I82429, I82C29, I82811, I824Z3, I82611, I825Y2, I82543, I82523, I82B21, I824Y9, I82B12, I82432, I82A11, I82413, I82521, I82402, I82493, I82601, I82B23, I82433, I82491, I82A19, I82541, I824Y3, I825Y1, I82729, I82C13, I82819, I824Z9, I82403, I82C12, I82419, I82721, I82512, I82B13, I82C11, I824Y1, I82431, I82C19, I821, I82A22, I82549, I82290, I82B29, I82619, I82411, I82221, I824Z1, I82813, I82702, I82529, I82592, I82891, I82723, I82210, I82609, I825Z2, I82532, I823, I82499, I82422, I82409, I82622, I82442, I82B19, I82A23, I82713, I82502, I82439, I825Y3, I82B11, I82593, I82401, I82712, I82591, I82513, I825Y9                                                                                                            |
| Varicose veins of lower extremities                                                           | 454                     | I83024, I83212, I83015, I83215, I83021, I83005, I83012, I83029, I83202, I8390, I83228, I83013, I8310, I83205, I83002, I83203, I83229, I83001, I8392, I83219, I83812, I83214, I83892, I83003, I83213, I83011, I83004, I83014, I83211, I83028, I83009, I83201, I83225, I83222, I83008, I83019, I8312, I83813, I83209, I8311, I83891, I83893, I83025, I83204, I83899, I83018, I8391, I83208, I83811, I83023, I83221, I8393, I83218, I83022, I83223, I83819, I83224                                                                                                                                                                                                                                                                                                                                                                                                                                                                                                                                                                                                                                                                                                           |
| Gangrene and amputations                                                                      | 785.4, 885-887, 895-897 | I96, S68019A, S68011A, S68511A, S68519A, S68022A, S68029A, S68522A, S68021A, S68012A, S68512A, S68521A, S68529A, S68126A, S68626A, S68629A, S68621A, S68123A, S68128A, S68614A, S68129A, S68612A, S68120A, S68114A, S68121A, S68628A, S68620A, S68127A, S68112A, S68623A, S68611A, S68125A, S68111A, S68113A, S68110A, S68616A, S68619A, S68618A, S68118A, S68116A, S68627A, S68119A, S68622A, S68122A, S68613A, S68124A, S68624A, S68617A, S68115A, S68117A, S68610A, S68625A, S68615A, S68429A, S48021A, S68412A, S58111A, S58911A, S68421A, S58919A, S48122A, S48922A, S48029A, S58021A, S68719A, S68411A, S68711A, S58922A, S58119A, S68722A, S48012A, S58029A, S48929A, S58012A, S68419A, S48019A, S48121A, S68422A, S58122A, S48129A, S48112A, S58019A, S58112A, S48921A, S68721A, S48011A, S48912A, S58929A, S58921A, S58912A, S48919A, S58129A, S68729A, S58121A, S48111A, S48911A, S48119A, S58022A, S58011A, S68712A, S48022A, S98122A, S98211A, S98219A, S98222A, S98132A, S98121A, S98212A, S98229A, S98142A, S98129A, S98131A, S98112A, S98221A, S98139A, S98149A, S98141A, S98119A, S98111A, S98029A, S98922A, S98021A, S98319A, S98311A, S98912A, S98929A, |

SUPPLEMENTARY DATA

| Chronic Complications of Diabetes             | ICD-9 codes | ICD-10 codes                                                                                                                                                                                                                                                                                                                                                                                                                                                                                                                                                                                                                                                                                                                                                                                                                                                                                                                                                                                                                                                                                                                                                                                                                                                                                                                                                                                                                                                                                                                                                                                                                                                                                                                                                                                                                                                                                                                                                                                                                                                                                                                                                                                                                       |
|-----------------------------------------------|-------------|------------------------------------------------------------------------------------------------------------------------------------------------------------------------------------------------------------------------------------------------------------------------------------------------------------------------------------------------------------------------------------------------------------------------------------------------------------------------------------------------------------------------------------------------------------------------------------------------------------------------------------------------------------------------------------------------------------------------------------------------------------------------------------------------------------------------------------------------------------------------------------------------------------------------------------------------------------------------------------------------------------------------------------------------------------------------------------------------------------------------------------------------------------------------------------------------------------------------------------------------------------------------------------------------------------------------------------------------------------------------------------------------------------------------------------------------------------------------------------------------------------------------------------------------------------------------------------------------------------------------------------------------------------------------------------------------------------------------------------------------------------------------------------------------------------------------------------------------------------------------------------------------------------------------------------------------------------------------------------------------------------------------------------------------------------------------------------------------------------------------------------------------------------------------------------------------------------------------------------|
|                                               |             | S98012A, S98019A, S98322A, S98921A, S98011A, S98911A, S98022A, S98321A, S98919A, S98312A, S98329A, S78022A, S88011A, S88121A, S88112A, S78911A, S78919A, S88022A, S88111A, S78111A, S78119A, S88919A, S88119A, S88029A, S88922A, S78122A, S88911A, S78029A, S88021A, S78021A, S78012A, S88122A, S78912A, S78929A, S88012A, S78922A, S78921A, S78112A, S78019A, S78121A, S88929A, S88129A, S78011A, S88019A, S78129A, S88912A, S88921A                                                                                                                                                                                                                                                                                                                                                                                                                                                                                                                                                                                                                                                                                                                                                                                                                                                                                                                                                                                                                                                                                                                                                                                                                                                                                                                                                                                                                                                                                                                                                                                                                                                                                                                                                                                              |
| Chronic ulcer of skin                         | 707         | L97512, L89100, L89013, L97119, L89624, L97804, L97101, L97403, L89810, L89014, L97322, L89520, L97104, L89329, L89110, L97419, L89519, L89600, L8993, L89501, L97223, L97819, L97404, L89509, L97803, L89621, L89203, L97411, L97924, L89302, L97109, L89629, L89504, L89143, L89149, L97921, L97414, L89602, L97401, L97524, L8991, L89213, L97502, L97809, L89150, L89004, L97801, L97221, L89522, L97529, L89123, L97224, L89204, L89141, L89214, L97103, L89311, L89211, L98422, L89019, L89892, L97521, L89613, L89219, L89132, L89209, L89020, L89130, L97212, L89001, L89314, L97511, L89812, L89144, L97902, L97122, L97409, L89201, L89003, L89603, L97912, L97929, L8994, L89313, L89220, L89129, L89112, L89303, L89893, L89011, L97202, L89222, L89500, L89102, L97501, L89113, L89124, L97503, L89009, L89891, L97923, L89612, L89121, L97123, L89601, L89894, L89811, L97213, L98492, L89119, L89614, L97513, L97514, L97422, L8942, L97229, L98429, L89521, L97822, L89134, L89814, L89301, L8940, L98423, L89114, L97914, L97919, L89322, L89131, L89152, L97913, L89813, L89319, L97312, L97324, L97321, L8945, L89529, L89604, L97323, L89103, L97121, L89320, L89523, L89022, L89899, L98424, L89524, L97911, L97124, L89101, L89619, L97812, L89512, L97424, L97821, L89309, L97302, L97519, L89200, L97412, L97211, L97329, L89010, L89133, L98412, L97909, L89310, L89109, L97823, L89153, L89139, L89304, L98421, L97102, L89609, L89622, L97504, L97214, L98413, L97423, L89510, L89111, L89620, L89104, L97903, L97303, L97201, L97829, L97203, L97311, L89819, L89000, L89323, L97509, L89611, L97314, L89023, L97209, L98491, L97522, L97824, L89151, L89140, L89210, L97802, L89122, L89154, L89120, L8944, L89223, L89142, L89221, L97301, L8941, L97313, L8992, L98411, L89224, L97129, L89012, L98493, L97114, L8943, L97429, L97219, L97112, L97922, L97421, L97813, L97111, L89029, L98494, L97204, L97222, L89502, L89229, L89321, L97413, L98499, L89212, L97304, L8990, L97402, L97904, L89312, L89324, L89021, L89503, L97901, L98414, L97319, L97523, L89610, L89002, L89159, L89513, L89511, L89514, L8995, L98419, L89890, L89202, L97309, L89623, L97113, L89024, L97811, L97814, L89300 |
| Diabetes w/peripheral circulatory disorders   | 250.7       | E1051, E1052, E1059, E1151, E1152, E1159, E1351, E1352, E1359                                                                                                                                                                                                                                                                                                                                                                                                                                                                                                                                                                                                                                                                                                                                                                                                                                                                                                                                                                                                                                                                                                                                                                                                                                                                                                                                                                                                                                                                                                                                                                                                                                                                                                                                                                                                                                                                                                                                                                                                                                                                                                                                                                      |
| <b>Cardiovascular Disease</b>                 |             |                                                                                                                                                                                                                                                                                                                                                                                                                                                                                                                                                                                                                                                                                                                                                                                                                                                                                                                                                                                                                                                                                                                                                                                                                                                                                                                                                                                                                                                                                                                                                                                                                                                                                                                                                                                                                                                                                                                                                                                                                                                                                                                                                                                                                                    |
| Aortic and other aneurysms                    | 441, 442    | I718, I790, I716, I7103, I715, I712, I7101, I714, I713, I719, I7100, I7102, I711, I724, I721, I723, I729, I720, I728, I722                                                                                                                                                                                                                                                                                                                                                                                                                                                                                                                                                                                                                                                                                                                                                                                                                                                                                                                                                                                                                                                                                                                                                                                                                                                                                                                                                                                                                                                                                                                                                                                                                                                                                                                                                                                                                                                                                                                                                                                                                                                                                                         |
| Hypotension                                   | 458         | I951, I9589, I959, I953, I950, I952, I9581                                                                                                                                                                                                                                                                                                                                                                                                                                                                                                                                                                                                                                                                                                                                                                                                                                                                                                                                                                                                                                                                                                                                                                                                                                                                                                                                                                                                                                                                                                                                                                                                                                                                                                                                                                                                                                                                                                                                                                                                                                                                                                                                                                                         |
| Angina                                        | 413         | I25708, I25738, I209, I25721, I25729, I25791, I208, I25728, I25731, I25701, I25719, I25799, I25711, I25739, I201, I25709, I25798, I25718, I25700, I25710, I25720, I25730, I25750, I25760, I25790, I25751, I25758, I25759, I2518                                                                                                                                                                                                                                                                                                                                                                                                                                                                                                                                                                                                                                                                                                                                                                                                                                                                                                                                                                                                                                                                                                                                                                                                                                                                                                                                                                                                                                                                                                                                                                                                                                                                                                                                                                                                                                                                                                                                                                                                    |
| Conduction disorders and cardiac dysrhythmias | 426-427     | I4430, I4519, I4581, I4589, I450, I4460, I440, I4510, I442, I447, I445, I452, I455, I4469, I459, I454, I453, I4439, I444, I441, I456, I4940, I482, I4901, I4892, I470, I472, I499, I493, I491, I481, I484, I483, I469, I479, I471, I4891, R001, I468, I4949, I498, I495, I492, I480, I4902, I462                                                                                                                                                                                                                                                                                                                                                                                                                                                                                                                                                                                                                                                                                                                                                                                                                                                                                                                                                                                                                                                                                                                                                                                                                                                                                                                                                                                                                                                                                                                                                                                                                                                                                                                                                                                                                                                                                                                                   |

SUPPLEMENTARY DATA

| Chronic Complications of Diabetes                                  | ICD-9 codes   | ICD-10 codes                                                                                                                                                                                                                                                                                                                                                                                                                                                                                                                                                                 |
|--------------------------------------------------------------------|---------------|------------------------------------------------------------------------------------------------------------------------------------------------------------------------------------------------------------------------------------------------------------------------------------------------------------------------------------------------------------------------------------------------------------------------------------------------------------------------------------------------------------------------------------------------------------------------------|
| Arteriosclerotic cardiovascular disease                            | 429.2         | I2510                                                                                                                                                                                                                                                                                                                                                                                                                                                                                                                                                                        |
| Cardiomegaly                                                       | 429.3         | I517                                                                                                                                                                                                                                                                                                                                                                                                                                                                                                                                                                         |
| Cardiomyopathy                                                     | 425           | I428, I426, I427, I420, I425, I422, I421, I424, I43, I429, I423                                                                                                                                                                                                                                                                                                                                                                                                                                                                                                              |
| Other acute and subacute forms of ischemic heart disease           | 411           | I249, I241, I200, I248, I240                                                                                                                                                                                                                                                                                                                                                                                                                                                                                                                                                 |
| Heart failure                                                      | 428           | I5020, I5040, I5031, I5022, I5042, I5043, I5021, I5023, I5030, I5041, I5032, I501, I509, I5033                                                                                                                                                                                                                                                                                                                                                                                                                                                                               |
| Myocardial degeneration                                            | 429.1         | I515                                                                                                                                                                                                                                                                                                                                                                                                                                                                                                                                                                         |
| Myocardial infarction                                              | 410, 412      | I222, I2121, I2102, R0989, I2111, I213, I229, I214, I2101, I221, I2129, I2119, I220, I2109, I228, I252                                                                                                                                                                                                                                                                                                                                                                                                                                                                       |
| Other chronic ischemic heart disease                               | 414           | I253, I25111, I2584, I2583, I25119, I2589, I25811, I259, I2542, I25118, I256, I25110, I25812, I2541, I2582, I25810, I25761, I25769, I25768, I255                                                                                                                                                                                                                                                                                                                                                                                                                             |
| Hypertension                                                       | 401-405       | I10, I119, I110, I120, I129, I1311, I130, I1310, I132, I152, I150, I151, I159, I158                                                                                                                                                                                                                                                                                                                                                                                                                                                                                          |
| <b>Renal Complications</b>                                         |               |                                                                                                                                                                                                                                                                                                                                                                                                                                                                                                                                                                              |
| Infections of kidney                                               | 590           | N118, N136, N110, N2886, N119, N111, N10, N2885, N12, N2884, N151                                                                                                                                                                                                                                                                                                                                                                                                                                                                                                            |
| Other disorders of bladder                                         | 596           | N323, N321, N329, N312, N99518, N33, N99510, N319, N3644, N320, N311, N99511, N99512, N322, N3289, N3281, N310, N318                                                                                                                                                                                                                                                                                                                                                                                                                                                         |
| Cystitis                                                           | 595           | N3090, N3030, N3010, N3041, N3000, N3021, N3080, N3091, N3040, N3081, N3031, N3011, N3020, N3001                                                                                                                                                                                                                                                                                                                                                                                                                                                                             |
| Renal sclerosis, unspecified                                       | 587           | N261, N262, N269                                                                                                                                                                                                                                                                                                                                                                                                                                                                                                                                                             |
| Glomerulonephritis, nephrotic syndrome, nephritis, and nephropathy | 580-583       | N005, N011, N013, N014, N002, N001, N003, N009, N018, N004, N019, N006, N008, N010, N016, N017, N007, N015, N000, N012, N029, N046, N026, N048, N028, N027, N040, B520, N047, N025, N020, N045, N042, N044, N022, N024, N043, N023, N021, N049, N041, N035, N032, N031, N033, N039, N034, N038, N036, N030, N037, N070, N056, N057, N143, N050, N058, N077, N064, E0922, N063, N072, N141, N144, N159, N158, N069, N053, N075, N073, N052, N071, N055, N061, N150, N16, N079, E0929, N08, N066, N051, N054, N067, N060, N078, N068, N074, N142, N059, N140, N062, N076, N065 |
| Proteinuria                                                        | 791.0         | R808, R800, R801, R803, R809                                                                                                                                                                                                                                                                                                                                                                                                                                                                                                                                                 |
| Renal failure and its sequelae                                     | 584, 586, 588 | N179, N178, N170, N172, N171, N19, N250, N2581, N251, N2589, N259                                                                                                                                                                                                                                                                                                                                                                                                                                                                                                            |
| Other disorders of kidney and ureter                               | 593           | N13732, N13729, N2889, N138, N135, N281, N289, N13731, N1370, R802, N13739, N134, N13722, N2882, N1371, N29, N2881, N280, N2883, N13721                                                                                                                                                                                                                                                                                                                                                                                                                                      |
| Urinary tract infection                                            | 599.0         | N390                                                                                                                                                                                                                                                                                                                                                                                                                                                                                                                                                                         |
| Diabetes and renal complications                                   | 250.4         | E1021, E1022, E1029, E1121, E1122, E1129, E1321, E1322, E1329                                                                                                                                                                                                                                                                                                                                                                                                                                                                                                                |
| Chronic renal failure (ESRD)                                       | 585           | N185, N186, N182, N183, N181, N189, N184                                                                                                                                                                                                                                                                                                                                                                                                                                                                                                                                     |
| <b>Endocrine/metabolic complications</b>                           |               |                                                                                                                                                                                                                                                                                                                                                                                                                                                                                                                                                                              |
| Glycogenosis and galactosemia                                      | 271.0, 271.1  | E739, E7402, E7253, E7411, E7419, E738, E7409, E744, E7403, E7431, E730, E7401, E7420, E7404, E749, E7412, E7439, E7421, E748, E7400, E7252, E7429, E7410, E731, E7250, E7251, E7259                                                                                                                                                                                                                                                                                                                                                                                         |
| Hypercholesterolemia                                               | 272.0         | E7800, E7801                                                                                                                                                                                                                                                                                                                                                                                                                                                                                                                                                                 |
| Hyperchylomicronemia                                               | 272.3         | E783                                                                                                                                                                                                                                                                                                                                                                                                                                                                                                                                                                         |
| Hyperkalemia                                                       | 276.7         | E875                                                                                                                                                                                                                                                                                                                                                                                                                                                                                                                                                                         |
| Hypertriglyceridemia                                               | 272.1         | E781                                                                                                                                                                                                                                                                                                                                                                                                                                                                                                                                                                         |
| Macroglobulinemia                                                  | 273.3         | C880                                                                                                                                                                                                                                                                                                                                                                                                                                                                                                                                                                         |
| Lancereaux's disease                                               | 261           | E43, E41                                                                                                                                                                                                                                                                                                                                                                                                                                                                                                                                                                     |

SUPPLEMENTARY DATA

| Chronic Complications of Diabetes               | ICD-9 codes  | ICD-10 codes                                                                                                                                                                                                                                                                                                                                                                                                                                                                                                                                                                                                                                                                                                                                                                                                                                                                                                                                                                                                                                                                                                                                                                                                                                                                                                                                                                                                                                                                                                                                                                                                                                                                                                                                                                                                                                                                                                                                                                                                                                                                                                                                                                                                                                                                                                                            |
|-------------------------------------------------|--------------|-----------------------------------------------------------------------------------------------------------------------------------------------------------------------------------------------------------------------------------------------------------------------------------------------------------------------------------------------------------------------------------------------------------------------------------------------------------------------------------------------------------------------------------------------------------------------------------------------------------------------------------------------------------------------------------------------------------------------------------------------------------------------------------------------------------------------------------------------------------------------------------------------------------------------------------------------------------------------------------------------------------------------------------------------------------------------------------------------------------------------------------------------------------------------------------------------------------------------------------------------------------------------------------------------------------------------------------------------------------------------------------------------------------------------------------------------------------------------------------------------------------------------------------------------------------------------------------------------------------------------------------------------------------------------------------------------------------------------------------------------------------------------------------------------------------------------------------------------------------------------------------------------------------------------------------------------------------------------------------------------------------------------------------------------------------------------------------------------------------------------------------------------------------------------------------------------------------------------------------------------------------------------------------------------------------------------------------------|
| Lipidoses                                       | 272.7        | E753, E771, E75240, E7521, E75242, E779, E75241, E75243, E75249, E778, E770, E75248, E7500, E7501, E7502, E7509, E7510, E7511, E7519, E756, E755, E7522                                                                                                                                                                                                                                                                                                                                                                                                                                                                                                                                                                                                                                                                                                                                                                                                                                                                                                                                                                                                                                                                                                                                                                                                                                                                                                                                                                                                                                                                                                                                                                                                                                                                                                                                                                                                                                                                                                                                                                                                                                                                                                                                                                                 |
| Other specified endocrine disorders             | 259.8        | E341, E348, E349                                                                                                                                                                                                                                                                                                                                                                                                                                                                                                                                                                                                                                                                                                                                                                                                                                                                                                                                                                                                                                                                                                                                                                                                                                                                                                                                                                                                                                                                                                                                                                                                                                                                                                                                                                                                                                                                                                                                                                                                                                                                                                                                                                                                                                                                                                                        |
| Other and unspecified hyperlipidemia            | 272.4        | E784, E785                                                                                                                                                                                                                                                                                                                                                                                                                                                                                                                                                                                                                                                                                                                                                                                                                                                                                                                                                                                                                                                                                                                                                                                                                                                                                                                                                                                                                                                                                                                                                                                                                                                                                                                                                                                                                                                                                                                                                                                                                                                                                                                                                                                                                                                                                                                              |
| Mixed hyperlipidemia                            | 272.2        | E782                                                                                                                                                                                                                                                                                                                                                                                                                                                                                                                                                                                                                                                                                                                                                                                                                                                                                                                                                                                                                                                                                                                                                                                                                                                                                                                                                                                                                                                                                                                                                                                                                                                                                                                                                                                                                                                                                                                                                                                                                                                                                                                                                                                                                                                                                                                                    |
| Renal glycosuria                                | 271.4        | E748                                                                                                                                                                                                                                                                                                                                                                                                                                                                                                                                                                                                                                                                                                                                                                                                                                                                                                                                                                                                                                                                                                                                                                                                                                                                                                                                                                                                                                                                                                                                                                                                                                                                                                                                                                                                                                                                                                                                                                                                                                                                                                                                                                                                                                                                                                                                    |
| <b>Ophthalmic complications</b>                 |              |                                                                                                                                                                                                                                                                                                                                                                                                                                                                                                                                                                                                                                                                                                                                                                                                                                                                                                                                                                                                                                                                                                                                                                                                                                                                                                                                                                                                                                                                                                                                                                                                                                                                                                                                                                                                                                                                                                                                                                                                                                                                                                                                                                                                                                                                                                                                         |
| Other retinal disorders                         | 362          | G453, H31101, H31102, H31103, H31109, H31111, H31112, H31113, H31119, H31121, H31122, H31123, H31129, H3400, H3401, H3402, H3403, H3410, H3411, H3412, H3413, H34211, H34212, H34213, H34219, H34231, H34232, H34233, H34239, H348110, H348111, H348112, H348120, H348121, H348122, H34813, H348190, H348191, H348192, H34821, H34822, H34823, H34829, H348310, H348311, H348312, H348320, H348321, H348322, H348330, H348331, H348332, H348390, H348391, H348392, H349, H3500, H35011, H35012, H35013, H35019, H35021, H35022, H35023, H35029, H35031, H35032, H35033, H35039, H35041, H35042, H35043, H35049, H35051, H35052, H35053, H35059, H35061, H35062, H35063, H35069, H35071, H35072, H35073, H35079, H3509, H35101, H35102, H35103, H35109, H35111, H35112, H35113, H35119, H35121, H35122, H35123, H35129, H35131, H35132, H35133, H35139, H35141, H35142, H35143, H35149, H35151, H35152, H35153, H35159, H35161, H35162, H35163, H35169, H35171, H35172, H35173, H35179, H3520, H3521, H3522, H3523, H3530, H353110, H353111, H353112, H353113, H353114, H353120, H353121, H353122, H353123, H353124, H353130, H353131, H353132, H353133, H353134, H353190, H353191, H353192, H353193, H353194, H353210, H353211, H353212, H353213, H353220, H353221, H353222, H353223, H353230, H353231, H353232, H353233, H353290, H353291, H353292, H353293, H3533, H35341, H35342, H35343, H35349, H35351, H35352, H35353, H35359, H35361, H35362, H35363, H35369, H35371, H35372, H35373, H35379, H35381, H35382, H35383, H35389, H3540, H35411, H35412, H35413, H35419, H35421, H35422, H35423, H35429, H35431, H35432, H35433, H35439, H35441, H35442, H35443, H35449, H35451, H35452, H35453, H35459, H35461, H35462, H35463, H35469, H3550, H3551, H3552, H3553, H3554, H3560, H3561, H3562, H3563, H3570, H35711, H35712, H35713, H35719, H35721, H35722, H35723, H35729, H35731, H35732, H35733, H35739, H3581, H3582, H3589, H359, H36, H31001, H31002, H31003, H31009, H31011, H31012, H31013, H31019, H31021, H31022, H31023, H31029, H31091, H31092, H31093, H31099, H3120, H3121, H3122, H3123, H3129, H31301, H31302, H31303, H31309, H31311, H31312, H31313, H31319, H31321, H31322, H31323, H31329, H31401, H31402, H31403, H31409, H31411, H31412, H31413, H31419, H31421, H31422, H31423, H31429, H318, H319, H31129 |
| Vascular disorders of the iris and ciliary body | 364.0, 364.4 | H21352, H2020, H21319, H21303, H21253, H21523, H20012, H21273, H21309, H21251, H20029, H2182, H21242, H21529, H2022, H21259, H21543, H2181, H20021, H21521, H21342, H2102, H21322, H21562, H21301, H21559, H21223, H21512, H21541, H21351, H21549, H20049, H21271, H20013, H21241, H20032, H21249, H21222, H20812, H21212, H20823, H20822, H20011, H21221, H21353, H21279, H2140, H21323, H21359, H20829, H20031, H21243, H2021, H20821, H21532, H21262, H2010, H21229, H2103, H21232, H20811, H20039, H219, H2189, H21561, H21321, H21502, H20033, H21349, H21511, H21341, H21563, H2000, H20052, H2101, H21569, H21272, H21312, H22, H211X2, H209, H20019,                                                                                                                                                                                                                                                                                                                                                                                                                                                                                                                                                                                                                                                                                                                                                                                                                                                                                                                                                                                                                                                                                                                                                                                                                                                                                                                                                                                                                                                                                                                                                                                                                                                                            |

SUPPLEMENTARY DATA

| Chronic Complications of Diabetes                | ICD-9 codes | ICD-10 codes                                                                                                                                                                                                                                                                                                                                                                                                                                                                                                                                                                                                                                                                                                                                                                                          |
|--------------------------------------------------|-------------|-------------------------------------------------------------------------------------------------------------------------------------------------------------------------------------------------------------------------------------------------------------------------------------------------------------------------------------------------------------------------------------------------------------------------------------------------------------------------------------------------------------------------------------------------------------------------------------------------------------------------------------------------------------------------------------------------------------------------------------------------------------------------------------------------------|
|                                                  |             | H21533, H21501, H21343, H20022, H2142, H21231, H2013, H20042, H2141, H20051, H21552, H20053, H211X1, H21513, H2023, H20813, H21211, H21213, H21531, H20819, H21233, H21519, H21553, H21239, H21329, H211X3, H2100, H21522, H21503, H21539, H21542, H21219, H2012, H20043, H20059, H2011, H21263, H21302, H21269, H21313, H21252, H20023, H20041, H21509, H2143, H21551, H2129, H211X9, H21261, H21311                                                                                                                                                                                                                                                                                                                                                                                                 |
| Disorders of the optic nerve and visual pathways | 377         | H47521, H47339, H4710, H47631, H4741, H47022, H4749, H4601, H4712, H4603, H479, H47639, H47322, H47642, H4743, H468, H47619, H47622, H47023, H47142, H47529, H47512, H47292, H47029, H4610, H47392, H4711, H47321, H47532, H4713, H47213, H47212, H47012, H47531, H47091, H47021, H47629, H47312, H47511, H47032, H47323, H4720, H4600, H47291, H47232, H47211, H4612, H47293, H47522, H47033, H47519, H47329, H47649, H47233, H462, H47313, H47143, H47332, H47092, H47612, H47632, H47231, H47099, H47093, H47149, H4613, H47391, H47393, H47013, H47539, H47641, H47621, H4602, H4742, H47333, H47219, H47239, H4722, H47011, H47319, H4611, H469, H47311, H47019, H47299, H47141, H47399, H47039, H47611, H47031, H463, H47331                                                                    |
| Diabetes with ophthalmic complications           | 250.5       | E10311, E10319, E1136, E11311, E13321, E11331, E13329, E13341, E13349, E11351, E1339, E13331, E13339, E1336, E13351, E1139, E11321, E11341, E13359, E103211, E103212, E103213, E103219, E1036, E1033, E10341, E10351, E133521, E133522, E133523, E133529, E133531, E133532, E133533, E133539, E133541, E133542, E133543, E133549, E13311, E13319, E133211, E133212, E133213, E133219, E133291, E133292, E133293, E133299, E133311, E133312, E133313, E133319, E133391, E133392, E133393, E133399, E133411, E133412, E133413, E133419, E133491, E133492, E133493, E133499, E133511, E133512, E133513, E133519, E133591, E133592, E133593, E133599, E1337, E1037X1, E1037X2, E1037X3, E1037X9, E1039, E13355, E10329, E10339, E10349, E10359, E11319, E11329, E11339, E11349, E11359                    |
| Cataract                                         | 366         | H26132, H2522, H26239, H26413, H26493, H26222, H26051, H26113, H25043, H26039, H26042, H25819, H28, H25041, H26053, H26131, H26102, H2523, H26133, H26491, H2510, H2512, H25012, H26111, H26411, H2620, H2631, H2640, H25049, H2633, H26223, H26009, H26101, H26419, H26221, H26119, H26059, H2521, H26062, H26499, H25033, H26043, H25093, H26122, H2609, H25092, H269, H26041, H26229, H26139, H25812, H26103, H25031, H25013, H26049, H25032, H26032, H25019, H26232, H26212, H26002, H26012, H25011, H2511, H25091, H26109, H26013, H2513, H2520, H26019, H25099, H26063, H259, H25813, H26233, H26129, H2589, H26052, H2630, H26121, H26219, H26231, H25042, H26031, H26492, H26069, H26033, H26412, H26001, H26112, H26123, H26213, H26061, H26211, H26003, H25811, H268, H2632, H26011, H25039 |
| Glaucoma                                         | 365         | H4043X4, H40811, H4060X1, H401330, H402210, H4051X1, H401390, H4020X4, H401310, H4051X4, H401321, H4020X1, H40819, H401212, H40243, H4041X2, H40051, H4063X3, H4062X4, H40022, H40059, H4061X2, H4030X2, H4033X2, H4032X2, H40241, H402292, H401324, H4011X2, H401292, H4033X0, H401422, H402223, H40831, H402224, H40043, H4063X4, H4043X3, H409, H40041, H402230, H40839, H40833, H4032X4, H401392, H4052X0, H4041X3, H40021, H4041X1, H401294, H4050X0, H4060X4, H401490, H4030X3, H401213, H401312, H4011X3, H40151, H401214, H4020X3, H4051X3, H4011X1, H4063X1, H401423, H401293, H402212, H402232, H4061X3, H4032X1, H401424, H401492, H40249, H402293, H401410, H4031X2, H40232, H4030X4, H4031X0, H4043X1, H402221, H401232, H4032X3, H401334, H4061X4, H40023,                              |

SUPPLEMENTARY DATA

| Chronic Complications of Diabetes                               | ICD-9 codes  | ICD-10 codes                                                                                                                                                                                                                                                                                                                                                                                                                                                                                                                                                                                                                                                                                                                                                                                                                                                                                                                                                                                                                                                                                                                                                                                                                                                                                                                                   |
|-----------------------------------------------------------------|--------------|------------------------------------------------------------------------------------------------------------------------------------------------------------------------------------------------------------------------------------------------------------------------------------------------------------------------------------------------------------------------------------------------------------------------------------------------------------------------------------------------------------------------------------------------------------------------------------------------------------------------------------------------------------------------------------------------------------------------------------------------------------------------------------------------------------------------------------------------------------------------------------------------------------------------------------------------------------------------------------------------------------------------------------------------------------------------------------------------------------------------------------------------------------------------------------------------------------------------------------------------------------------------------------------------------------------------------------------------|
|                                                                 |              | H402213, H40159, H40049, H401233, H4041X4, H42, H4033X1, H401291, H4061X1, H40821, H401412, H401323, H401394, H401333, H40011, H4052X2, H40152, H401220, H402214, H401211, H4062X0, H4050X2, H401421, H40212, H401314, H401432, H4010X0, H40153, H4060X2, H401231, H40029, H401311, H40213, H40233, H40032, H401391, H40823, H4053X0, H40211, H4033X4, H402291, H4060X0, H40052, H401222, H40063, H402234, H401493, H401331, H401313, H4042X2, H401491, H4011X4, H4030X1, H401430, H4062X2, H4053X2, H40822, H401393, H40069, H401210, H402211, H40012, H40013, H40002, H401332, H4031X4, H4042X0, H4051X0, H4043X0, H401411, H40061, H40062, H401414, H4031X1, H40019, H4040X2, H401494, H4033X3, H402233, H401234, H4062X3, H401434, H402231, H4010X2, H402220, H40832, H40033, H4011X0, H40231, H4020X0, H4042X3, H4043X2, H4050X4, H401413, H4040X3, H40003, H4061X0, H40239, H40009, H401431, H4062X1, H4051X2, H40829, H4031X3, H4052X3, H402222, H4020X2, H4030X0, H4042X1, H40031, H4040X0, H4063X0, H4041X0, H402294, H401223, H4052X1, H40219, H4032X0, H4053X4, H401320, H401433, H401221, H40001, H401230, H401290, H4063X2, H40053, H4052X4, H4053X1, H40039, H4040X4, H4010X1, H4050X1, H401224, H401322, H4042X4, H4089, H40042, H4040X1, H401420, H4050X3, H4060X3, H4010X3, H40242, H40813, H4010X4, H4053X3, H40812, H402290 |
| Visual disturbance, low vision, blindness                       | 368-369      | H5359, H5351, H53439, H53012, H53122, H53489, H532, H5354, H53453, H53021, H5310, H5316, H5360, H53422, H5330, H53142, H53029, H53459, H53032, H5362, H53451, H5315, R441, H53123, H53141, H53421, H53011, H53001, H53002, H53143, H53121, H53149, H539, H5332, H53033, H53423, H53009, H53003, H53013, H53412, H5372, H53432, H5355, H5311, H5350, H53429, H5334, H5361, H53132, H53129, H538, H5331, H53413, H53039, H5352, H53131, H53462, H53019, H53031, H53133, H5340, H53482, H5319, H5347, H5333, H53481, H53452, H5363, H53022, H53469, R483, H53139, H53483, H53433, H5369, H53419, H5371, H53431, H53411, H53461, H53023, H5353, H5440, H548 H5442 H547 H540 H5451, H542, H5460, H5410, H5412, H5462, H5441, H5461, H5450, H5411, H543, H5452                                                                                                                                                                                                                                                                                                                                                                                                                                                                                                                                                                                       |
| <b>Other complications</b>                                      |              |                                                                                                                                                                                                                                                                                                                                                                                                                                                                                                                                                                                                                                                                                                                                                                                                                                                                                                                                                                                                                                                                                                                                                                                                                                                                                                                                                |
| Bacteremia, bacterial infection                                 | 079.2, 790.7 | R7881                                                                                                                                                                                                                                                                                                                                                                                                                                                                                                                                                                                                                                                                                                                                                                                                                                                                                                                                                                                                                                                                                                                                                                                                                                                                                                                                          |
| Candidiasis of skin and nails                                   | 112.3        | B372                                                                                                                                                                                                                                                                                                                                                                                                                                                                                                                                                                                                                                                                                                                                                                                                                                                                                                                                                                                                                                                                                                                                                                                                                                                                                                                                           |
| Chronic osteomyelitis of the foot                               | 730.17       | M86679, M86479, M86572, M86471, M86571, M86372, M86579, M86371, M868X7, M86672, M86671, M86379, M86472                                                                                                                                                                                                                                                                                                                                                                                                                                                                                                                                                                                                                                                                                                                                                                                                                                                                                                                                                                                                                                                                                                                                                                                                                                         |
| Other and unspecified noninfectious gastroenteritis and colitis | 558.9        | K5289, K529                                                                                                                                                                                                                                                                                                                                                                                                                                                                                                                                                                                                                                                                                                                                                                                                                                                                                                                                                                                                                                                                                                                                                                                                                                                                                                                                    |
| Impotence of organic origin                                     | 607.84       | N5201, N5202, N5203, N521, N522, N5231, N5232, N5233, N5234, N5239, N528, N529                                                                                                                                                                                                                                                                                                                                                                                                                                                                                                                                                                                                                                                                                                                                                                                                                                                                                                                                                                                                                                                                                                                                                                                                                                                                 |
| Infective otitis externa                                        | 380.1        | H603, H6000, H6010, H60319, H60329, H60399, H6193, H60339; H6240; H6020; H628X1; H60399                                                                                                                                                                                                                                                                                                                                                                                                                                                                                                                                                                                                                                                                                                                                                                                                                                                                                                                                                                                                                                                                                                                                                                                                                                                        |
| Degenerative skin disorders                                     | 709.3        | L921, L942, L988                                                                                                                                                                                                                                                                                                                                                                                                                                                                                                                                                                                                                                                                                                                                                                                                                                                                                                                                                                                                                                                                                                                                                                                                                                                                                                                               |
| Candidiasis of vulva and vagina                                 | 112.1        | B373                                                                                                                                                                                                                                                                                                                                                                                                                                                                                                                                                                                                                                                                                                                                                                                                                                                                                                                                                                                                                                                                                                                                                                                                                                                                                                                                           |
| Cellulitis                                                      | 681, 682     | L03022, L03041, L03029, L03012, L03021, L03011, L03031, L03032, L03019, L03049, L03039, L03042, L03811, L03114, L03126, L03891, L03322, L02212, L03325, L03221, L02818, L03119, L03111, L0390, L03212, L03317, L03323, L02213, L03316, L0211, L02511, L0291, L02215, L0201, L03818, L03125, L02219, L02214, L03116, L02415, L02211, L03329, L0391, L02612, L0231, L03898, L02519, L02412, L02416, L03124, L03123, L03314, L03315, L03122, L03211, L03324,                                                                                                                                                                                                                                                                                                                                                                                                                                                                                                                                                                                                                                                                                                                                                                                                                                                                                      |



SUPPLEMENTARY DATA

| Chronic Complications of Diabetes                      | ICD-9 codes | ICD-10 codes                                                                                                                                                                                                        |
|--------------------------------------------------------|-------------|---------------------------------------------------------------------------------------------------------------------------------------------------------------------------------------------------------------------|
|                                                        |             | L03121, L03112, L03321, L02611, L03115, L983, L02811, L03129, L03312, L02413, L02216, L02419, L03311, L03222, L02411, L02512, L03326, L02414, L03113, L03319, L03327, L02619, L03313, k122, L03213                  |
| Diabetes with other specified manifestations           | 250.8       | E13638, E10622, E10620, E13618, E13621, E1069, E13649, E11628, E10630, E10618, E13630, E11620, E10621, E10638, E10649, E1169, E13628, E1369, E13620, E11622, E11621, E11649, E11630, E11618, E10628, E11638, E13622 |
| Diabetes with unspecified complication                 | 250.9       | E118, E138, E108                                                                                                                                                                                                    |
| Other bone involvement in disease classified elsewhere | 731.8       | M90852, M90839, M90869, M90872, M90831, M90871, M90822, M9089, M9088, M90851, M90819, M90842, M90821, M9080, M90879, M90812, M90841, M90862, M90859, M90832, M90829, M90849, M90861, M90811                         |
| Hypoglycemic coma                                      | 251.0       | E162, E169, E164, E163, E15, E161, E168, E160, E11641, E13641, E10641                                                                                                                                               |
| Gastroparesis                                          | 536.3       | K3184                                                                                                                                                                                                               |

SUPPLEMENTARY DATA

| <b>Chronic Complications of Diabetes</b>                           | <b>ICD-9 codes</b> |
|--------------------------------------------------------------------|--------------------|
| Arteriosclerotic cardiovascular disease                            | 429.2              |
| Cardiomegaly                                                       | 429.3              |
| Cardiomyopathy                                                     | 425                |
| Other acute and subacute forms of ischemic heart disease           | 411                |
| Heart failure                                                      | 428                |
| Myocardial degeneration                                            | 429.1              |
| Myocardial infarction                                              | 410, 412           |
| Other chronic ischemic heart disease                               | 414                |
| Hypertension                                                       | 401-405            |
| <b>Renal Complications</b>                                         |                    |
| Infections of kidney                                               | 590                |
| Other disorders of bladder                                         | 596                |
| Cystitis                                                           | 595                |
| Renal sclerosis, unspecified                                       | 587                |
| Glomerulonephritis, nephrotic syndrome, nephritis, and nephropathy | 580-583            |
| Proteinuria                                                        | 791.0              |
| Renal failure and its sequelae                                     | 584, 586, 588      |
| Other disorders of kidney and ureter                               | 593                |
| Urinary tract infection                                            | 599.0              |
| Diabetes and renal complications                                   | 250.4              |
| Chronic renal failure (ESRD)                                       | 585                |
| <b>Endocrine/metabolic complications</b>                           |                    |
| Glycogenosis and galactosemia                                      | 271.0, 271.1       |
| Hypercholesterolemia                                               | 272.0              |
| Hyperchylomicronemia                                               | 272.3              |
| Hyperkalemia                                                       | 276.7              |
| Hypertriglyceridemia                                               | 272.1              |
| Macroglobulinemia                                                  | 273.3              |
| Lancereaux's disease                                               | 261                |
| Lipidoses                                                          | 272.7              |
| Other specified endocrine disorders                                | 259.8              |
| Other and unspecified hyperlipidemia                               | 272.4              |
| Mixed hyperlipidemia                                               | 272.2              |
| Renal glycosuria                                                   | 271.4              |
| <b>Ophthalmic complications</b>                                    |                    |
| Other retinal disorders                                            | 362                |
| Vascular disorders of the iris and ciliary body                    | 364.0, 364.4       |
| Disorders of the optic nerve and visual pathways                   | 377                |
| Diabetes with ophthalmic complications                             | 250.5              |
| Cataract                                                           | 366                |
| Glaucoma                                                           | 365                |
| Visual disturbance, low vision, blindness                          | 368-369            |
| <b>Other complications</b>                                         |                    |
| Bacteremia, bacterial infection                                    | 079.2, 790.7       |
| Candidiasis of skin and nails                                      | 112.3              |
| Chronic osteomyelitis of the foot                                  | 730.17             |
| Other and unspecified noninfectious gastroenteritis and colitis    | 558.9              |
| Impotence of organic origin                                        | 607.84             |
| Infective otitis externa                                           | 380.1              |

## SUPPLEMENTARY DATA

| <b>Chronic Complications of Diabetes</b>               | <b>ICD-9 codes</b> |
|--------------------------------------------------------|--------------------|
| Degenerative skin disorders                            | 709.3              |
| Candidiasis of vulva and vagina                        | 112.1              |
| Cellulitis                                             | 681, 682           |
| Diabetes with other specified manifestations           | 250.8              |
| Diabetes with unspecified complication                 | 250.9              |
| Other bone involvement in disease classified elsewhere | 731.8              |
| Hypoglycemic coma                                      | 251.0              |
| Gastroparesis                                          | 536.3              |

ICD-9, International Classification of Diseases, Ninth Revision. ICD-10 codes are available upon request.
